1 **Title: Secreted inhibitors drive the loss of regeneration competence**  
2 **in *Xenopus* limbs**

3  
4 **Short title:** *Extrinsic cues regulate limb regeneration*

5  
6 **One Sentence Summary:** Extrinsic cues associated with chondrogenic progression inhibit  
7 AER cell formation and restrict limb regeneration potential.

8  
9 C. Aztekin<sup>1,2\*</sup>, T. W. Hiscock<sup>1,3\*</sup>, J. B. Gurdon<sup>1,2</sup>, J. Jullien<sup>1,2,4†</sup>, J. C. Marioni<sup>3,5,6†</sup>, B.  
10 D. Simons<sup>1,7,8†</sup>

11 **Affiliations**

12 <sup>1</sup>Wellcome Trust/Cancer Research UK Gurdon Institute, University of Cambridge,  
13 Cambridge, UK.

14 <sup>2</sup>Department of Zoology, University of Cambridge, Cambridge, UK.

15 <sup>3</sup>Cancer Research UK Cambridge Institute, University of Cambridge, Cambridge, UK.

16 <sup>4</sup>Nantes Université, Inserm, Centre de Recherche en Transplantation et Immunologie, UMR  
17 1064, ITUN, F-44000 Nantes, France

18  
19 <sup>5</sup>EMBL–European Bioinformatics Institute, Wellcome Genome Campus, Cambridge, UK.

20 <sup>6</sup>Wellcome Sanger Institute, Wellcome Genome Campus, Cambridge, UK.

21 <sup>7</sup>Department of Applied Mathematics and Theoretical Physics, Centre for Mathematical  
22 Sciences, University of Cambridge, Cambridge, UK.

23 <sup>8</sup>Wellcome Trust Centre for Stem Cell Research, University of Cambridge, Cambridge, UK.

24 \*Co-first authors.

25 †Corresponding authors; listed in alphabetical order.

26  
27 Correspondence to: [jerome.jullien@inserm.fr](mailto:jerome.jullien@inserm.fr) (J.J); [marioni@ebi.ac.uk](mailto:marioni@ebi.ac.uk) (J.C.M);  
28 [bds10@cam.ac.uk](mailto:bds10@cam.ac.uk) (B.D.S.)

29  
30  
31  
32  
33  
34  
35  
36  
37

38 **Abstract**

39

40 Absence of a specialised wound epidermis is hypothesised to block limb regeneration in higher  
41 vertebrates. To elucidate the cellular and molecular determinants of this tissue, we performed  
42 single-cell transcriptomics in regeneration-competent, -restricted, and -incompetent *Xenopus*  
43 tadpoles. We identified apical-ectodermal-ridge (AER) cells as the specialised wound  
44 epidermis, and found that their abundance on the amputation plane correlates with regeneration  
45 potential and injury-induced mesenchymal plasticity. By using *ex vivo* regenerating limb  
46 cultures, we demonstrate that extrinsic cues produced during limb development block AER  
47 cell formation. We identify *Noggin*, a morphogen expressed in cartilage/bone progenitor cells,  
48 as one of the key inhibitors of AER cell formation in regeneration-incompetent tadpoles.  
49 Extrinsic inhibitory cues can be overridden by *Fgf10*, which operates upstream of *Noggin* and  
50 blocks chondrogenesis. Together, these results indicate that manipulation of the extracellular  
51 environment and/or chondrogenesis may provide a strategy to restore regeneration potential in  
52 higher vertebrates.

---

53

54

55

56

57

58

59

60

61

62

63

64

65

66

67

68

69

70

71

72

73

74

75

76

77

78

79

80

81

## 82 **Introduction**

83

84 Amphibian limb regeneration relies on a specialised wound epidermis (also known as the  
85 apical-epithelial-cap, AEC). It has been hypothesised that the absence of this tissue limits the  
86 regeneration potential of higher vertebrates, including mammals (1). The AEC was suggested  
87 to be analogous to the apical-ectodermal-ridge (AER) that is specifically seen during limb  
88 development, since both tissues are required for proximal-distal outgrowth, and express *Fgf8*  
89 at the distal tips of limb buds/amputation planes (2). It has been proposed that the AER  
90 functions to maintain and enable proliferation of underlying cells in distal mesoderm.  
91 Similarly, the AEC was hypothesised to be formed upon amputation in order to enable the self-  
92 renewal of underlying progenitor and dedifferentiated cells, leading to the formation of a  
93 proliferative structure called the blastema (3). Injury was thought to induce dedifferentiation  
94 of cells that can interact with AEC to build a blastema (4), although it is not clear how a  
95 specialised wound epidermis forms during regeneration and why it cannot form in some  
96 instances/species.

97

98 *Xenopus laevis* tadpoles lose limb regeneration ability progressively during their development,  
99 coinciding with their inability to form a specialised wound epidermis (5, 6). At the  
100 developmental stages prior to the formation of digits, amputations lead to a complete  
101 regeneration of the limb (Niewkoop & Faber (7) (NF) ~52-54, regeneration-competent). As  
102 autopod development proceeds, amputations result in partial regeneration, characterized by  
103 missing digits (NF ~55-57, regeneration-restricted). Towards metamorphosis, amputations  
104 either cause the growth of a spike-like cartilaginous structure without joints and muscles, or a  
105 simple wound healing (NF ~58 and beyond, regeneration-incompetent). Moreover, *Xenopus*  
106 limb regeneration ability declines when amputations are performed at more proximal regions  
107 of the limb, where there are more mature chondrogenic and osteogenic cells (8, 9). Likewise  
108 amputation through bone results in reduced regeneration compared to amputations at the joints  
109 (8, 9). Nevertheless, certain procedures (e.g. FGF8 or FGF10 bead applications) can induce  
110 specialised wound epidermis formation and restore, or contribute to, limb regeneration in  
111 otherwise regeneration-incompetent species (10, 11). Therefore, investigating the cellular and  
112 molecular mechanisms controlling specialised wound epidermis formation can help to devise  
113 new strategies to promote mammalian limb regeneration.

114

### 115 ***Single-cell RNA-seq analysis reveals cell type heterogeneity during development and*** 116 ***following amputation of the limb***

117

118 To characterise cellular changes associated with regeneration-ability, we first sequenced  
119 developing intact hindlimbs at particular morphologically-defined stages: NF Stage ~52 (limb  
120 bud stages), NF Stage ~54 (autopod forming) and NF Stage ~56 (autopod formed) (**Fig. 1A**).  
121 Then, to evaluate the cellular responses to injury and regeneration, we profiled cells from  
122 amputated limbs and their contralateral controls. Specifically, we amputated hindlimbs from  
123 presumptive knee/ankle levels for regeneration-competent tadpoles (NF Stage ~52-53) and  
124 ankle level for –restricted (NF Stage ~55-56) and –incompetent tadpoles (NF Stage ~58-60),  
125 and sequenced cells from newly-generated tissues at 5 days post-amputation (dpa) (**Fig. 1B**)

126 when the specialised wound epidermis and blastema are seen morphologically (2).  
127 Contralateral developing limb buds or autopods were sequenced as controls. We did not include  
128 a contralateral control at the regeneration-incompetent stage as we were not able to obtain cells  
129 with the dissociation protocol used to process the other samples.

130  
131 Next, we pooled the single-cell RNA sequencing data derived from at least two replicates for  
132 each condition (**Fig. S1**), corrected our atlas for cell cycle effects (**Fig. S2**), resulting in a total  
133 of 42,348 cells (**Methods; Fig. 1C-D, Fig. S3-4**). Following clustering of cells based upon  
134 their gene expression profiles, examination of multiple marker genes (**Fig. S5**) revealed at least  
135 60 distinct clusters representative of putative cell types (**Fig. 1C and Fig. S3**) including known  
136 populations (e.g. AER cells) and potentially new uncharacterised cell states (e.g. a *Piwill*+  
137 population in the mesenchyme) (**Fig. 1E**). From the cell atlas, we were able to detect cell cycle  
138 differences between cell types, e.g. distal mesenchyme progenitors were more biased towards  
139 G2/M phases compared to proximal mesenchyme progenitors (**Fig. S2D**), as reported in mouse  
140 (12). The *Xenopus* limb cell atlas is accessible using an interactive platform  
141 (<https://marionilab.cruk.cam.ac.uk/XenopusLimbRegeneration/>).

#### 142 143 ***Quantitative features of AER cell formation are associated with regeneration outcome***

144  
145 We then focused on the specialised wound epidermis, or AEC, that was suggested to be  
146 analogous to the AER. Although both populations were characterized by *Fgf8* expression (2),  
147 the extent of similarity between these cells was unclear. In our data, we could detect mostly  
148 quantitative gene expression differences between cells defined as belonging to the AER  
149 (defined as *Fgf8* expressing epidermal cells during limb development) and the AEC (*Fgf8*  
150 expressing epidermal cells in 5 dpa samples) (**Fig. 2A-B**). Moreover, cells related to these  
151 tissues were aggregated in the same *Fgf8*+ epidermal cluster (**Fig. 2B-C**). Additionally, both  
152 during development and post-amputation, 5 dpa *Fgf8*+ epidermal cells were mostly detected  
153 as a monolayer of polarised cuboidal basal cells, (**Fig. S6**) though multilayers were seen to  
154 form in some instances (**Fig. S7**). Hence, based on their transcriptomic signature, tissue  
155 localisation, and general cellular morphology, the cells populating the AER structure during  
156 development and the AEC specialised wound epidermis structure found during regeneration  
157 were referred to as *AER cells* in this study. Finally, we found that AER cells (limb specialised  
158 wound epidermal cells) and cells that define the specialised wound epidermis during *Xenopus*  
159 tail regeneration (regeneration-organising-cells, ROCs (13)) showed similar, but non-identical  
160 gene expression profiles (**Fig. S8**), emphasizing that different cell types operate in different  
161 appendage regeneration scenarios.

162  
163 Limb amputation results in the formation of *Fgf8* expressing AEC at the amputation plane in  
164 regeneration-competent tadpoles, but not in -incompetent tadpoles (6), while AEC formation  
165 has not been characterised previously for -restricted tadpoles. Using our atlas, we found that,  
166 at 5 dpa, tadpole epidermis contained abundant AER cells in regeneration-competent tadpoles,  
167 a limited number of AER cells in -restricted tadpoles, and that AER cells were largely absent  
168 from -incompetent tadpoles (**Fig. 2B-D**). The signalling centre properties of AER cells was  
169 reflected in the many diverse ligands they express, which can influence proliferation and cell

170 fate decisions (**Fig. 2E and Fig. S9**). Although *Fgf8* was always expressed in AER cells,  
171 relative expression of *Fgf8* and other ligands varied among conditions (**Fig. 2E**). Overall, while  
172 the signalling centre potency of AER cells appears variable, a strong correlation between AER  
173 cell abundance and regeneration-outcome was evident.

174

### 175 *The presence of AER cells has an association with injury-induced mesenchymal plasticity*

176

177 It has been suggested that the AEC enables the self-renewal activity of dedifferentiated cells,  
178 leading to blastema formation (3). To identify signatures of dedifferentiation in our atlas, we  
179 first examined the expression of genes related to dedifferentiation and blastema formation (e.g.  
180 *Sall4*, *Kazald1*, *Marcks11* (14)). We observed that these genes were found to be either already  
181 expressed before amputation or upregulated upon amputation in a subset of fibroblasts (**Fig.**  
182 **S10A-B**), which were located near the skin and perichondrium (**Fig. S11**). Likewise, we found  
183 that a small fraction of these fibroblasts expressed muscle-related genes (e.g. *Pax3*) before and  
184 after amputation (**Fig. S10B**). Moreover, independent of regeneration-outcome, amputation  
185 resulted in these fibroblast cells to express genes related to distal mesenchyme progenitors (e.g.  
186 *Grem1*, *Shh*, *Msx1*, *Fgf10*), and chondrogenesis (e.g. *Col8a2*, *Sox9*) (**Fig. S10A**). Lastly,  
187 amputation not only increased the expression of known marker genes, but also up-regulated  
188 the expression of an entire putative distal mesenchyme progenitor gene set (**Fig. S10C**), with  
189 the magnitude of this expression being lower in samples having fewer AER cells. Together,  
190 we concluded that, upon amputation, a subset of fibroblasts manifest injury-induced  
191 mesenchymal plasticity, the extent of which tracks with AER cell abundance.

192

### 193 *AER cell formation requires activation of multiple signalling pathways*

194

195 To investigate the molecular mechanisms that mediate AER cell formation upon amputation,  
196 we developed an *ex vivo* regenerating limb culture protocol, inspired by previous work (15)  
197 (**Fig. 3A**). By culturing amputated stylopod or zeugopod/stylopod from regeneration-  
198 competent and –restricted tadpoles, respectively, we observed *Fgf8* cell formation at the distal  
199 part of explants within 3 dpa (**Fig. 3B**). These explants also exhibited cone-shaped growth as  
200 cells accumulated uniformly underneath *Fgf8* cells, mimicking *in vivo* regeneration (**Fig. 3A-**  
201 **B, Fig S12B**). Interestingly, the proximal site of explants was also covered with epidermis (**Fig.**  
202 **S13A**), but neither *Fgf8* expressing cells nor a uniform cell accumulation underneath the  
203 epidermis was observed (**Fig. 3A-B, S12B**). Moreover, the proximal site of the explant  
204 exhibited active chondrogenesis, manifesting in an outwards growth of cartilaginous tissue  
205 (**Fig. 3A, Fig S12C**). This phenotype was particularly pronounced when explants were  
206 harvested from developmental stages in which proximal tissues were advanced in  
207 chondrogenesis (onset of NF Stage 53-54) (**Fig. S12D**), and could be further enhanced by  
208 addition of BMP4, a known chondrogenesis inducer (**Fig S12E**). Hence, the proximal and distal  
209 sites of limb explants exhibit different behaviours: the distal sites recapitulate localised AER  
210 cell formation as seen *in vivo*, while the proximal site is characterised by active chondrogenesis.

211

212 In addition to changes associated with regeneration, explants could be used to determine  
213 signalling requirements for specialised wound epidermis formation. Inhibition of FGF, BMP,

214 and WNT pathways via small molecule inhibitors blocked AER cell formation in explants (**Fig.**  
215 **3C**), reinforcing the conclusion that the reported *in vivo* AEC effects are mediated through a  
216 direct effect on the limb rather than a systemic effect (16–18). Moreover, by using the culture  
217 assay, we found that active TGF- $\beta$  and NOTCH signalling are also required for *Xenopus* AER  
218 cell formation (**Fig. 3C**). Overall, we concluded that AER cell formation requires the activity  
219 of multiple major signalling pathways.

220

### 221 *AER cells can form without cell division*

222

223 Having established the molecular pathways required for AER cell formation, we asked how  
224 AER cells form on the amputation plane. By tracing skin tissue located on the edge of explants  
225 we found that they contributed to the covering of both the distal and proximal sites (**Fig. S13B**).  
226 As the amputation planes are covered by skin tissue from the surrounding area, we reasoned  
227 that AER cells are likely to have originated from skin cells. As amputation eliminates the  
228 majority, if not all, of AER cells in the limb, we hypothesized that AER cells are derived from  
229 remaining skin stem cells. If AER cells are induced through proliferation and differentiation  
230 following amputation, all AER cells should be the product of cell division. To test this, we  
231 assayed the level of EdU incorporation in newly-formed AER cells. Surprisingly, we found  
232 that only ~40% of AER cells (distal epidermal *Fgf8*<sup>+</sup>) were EdU positive at 3 dpa (**Fig. S13C**),  
233 suggesting that most AER cells are induced independent of cell division following amputation.  
234 Consistently, a step-wise activation of *Lgr5.S* (a WNT target gene) followed by *Fgf8.L*  
235 expressions was identified as a possible gene-expression trajectory that could allow basal  
236 epidermal cells to convert directly to AER cells (**Fig. 3D**). Consistent with such a process,  
237 when visualized *in vivo*, we found that *Fgf8*<sup>+</sup>/*Lgr5*<sup>+</sup> AER cells were flanked by *Lgr5*<sup>+</sup> cells in  
238 the basal epidermis on the amputation plane or in the developing limb (**Fig. 3E, Fig. S6**).  
239 Overall, these results support the hypothesis that basal epidermal cells can acquire AER cell  
240 identity without cell division.

241

### 242 *Loss of regeneration potential is associated with extrinsic cues inhibitory to AER formation*

243

244 We then asked why fewer, or no, AER cells form on the amputation plane of regeneration-  
245 restricted or -incompetent tadpoles, respectively. Previous studies have shown that addition of  
246 *Fgf10* can induce AER formation in otherwise regeneration-incompetent tadpoles (10),  
247 suggesting that epidermal cells in these animals are intrinsically competent to form AER cells.  
248 Hence, we focused on the possibility that extrinsic cues are the basis for a reduced regeneration  
249 potential.

250

251 To test whether environmental factors secreted from -incompetent tadpoles would block AER  
252 cell formation, we took advantage of our *ex vivo* cultures. First, we co-cultured *ex vivo* limbs  
253 from regeneration-competent and -incompetent tadpoles. Strikingly, when such cultures were  
254 stained against *Fgf8* at 3 dpa, we observed that regeneration-competent tadpole limbs failed to  
255 form AER cells (**Fig. 4A**). Second, we collected media from regeneration-incompetent tadpole  
256 explants and cultured freshly amputated regeneration-competent explants with this conditioned  
257 media. Consistent with the co-culture experiment, the conditioned media from regeneration-

258 incompetent tadpoles blocked AER cell formation in -competent explants (**Fig. 4B**). By  
259 contrast, neither co-culturing with regeneration-competent explants, nor preparing conditioned  
260 media from regeneration-competent explants, affected AER cell formation in regeneration-  
261 competent explants (**Fig 4A-B**). Additionally, conditioned media from regeneration-  
262 competent explants was unable to induce AER cell formation in -incompetent explants (**Fig**  
263 **S14**). Altogether, these results suggest that secreted inhibitory factors block AER cell  
264 formation in regeneration-incompetent tadpoles compromising their regeneration potential.

265  
266 To identify the factors responsible for this inhibitory effect, we surveyed our single-cell atlas  
267 for the expression of secreted proteins involved in signalling pathways required for AER cell  
268 formation. We found that the loss of regeneration potential is associated with an increased  
269 proportion of chondrogenic lineage cells in the mesenchyme (**Fig. 4C**), and that these cells  
270 express multiple inhibitory ligands for BMP and WNT pathways (**Fig. 4D**). As chondrogenic  
271 populations specifically express high levels of *Noggin* (**Fig. 4D**), a known antagonist of BMP  
272 signalling, we hypothesised that AER cell formation is antagonised by an excess of secreted  
273 *Noggin* in regeneration-incompetent tadpoles. Indeed, consistent with previous observations  
274 (19), addition of NOGGIN to regeneration-competent *ex vivo* limbs blocked AER cell  
275 formation (**Fig. S15A**). To test if *Noggin* does indeed act as one of the inhibitory extrinsic cues  
276 produced following amputation in regeneration-incompetent tadpoles, we blocked NOGGIN  
277 in our co-culture and conditioned media experiments using anti-NOGGIN antibodies (**Fig. 4A-**  
278 **B**). Strikingly, blocking secreted NOGGIN by antibody addition cancelled the inhibitory  
279 activity on AER cell formation in both co-culture and conditioned media experiments (**Fig. 4**  
280 **A-B**).

281  
282 As these experiments point towards the chondrogenic lineage as the source of inhibitory  
283 extrinsic cues, we then asked if limiting chondrogenesis can promote AER cell formation. To  
284 this end, we generated tip explants by culturing distal limb buds (NF Stage ~52) or early formed  
285 autopods (NF Stage ~54) without their proximal segment, where the most advanced  
286 chondrogenesis takes place. Indeed, these tip explants showed ectopic *Fgf8* expression at  
287 different sites of the epidermis further suggesting a localised and/or long-range inhibitory effect  
288 of secreted factors from mature chondrogenic cells (**Fig. S15B**). Overall, these results indicate  
289 that the loss of regeneration ability is associated with extrinsic cues, including NOGGIN,  
290 inhibitory to AER cell formation.

291  
292 To test if manipulation of BMP signalling can also enhance AER cell formation in  
293 regeneration-competent tadpoles, we perturbed the BMP pathway. Indeed, we found that  
294 inhibiting NOGGIN could increase the formation of AER cells (**Fig. S15A**). By contrast, the  
295 addition of BMP4 to regeneration-competent *ex vivo* cultures blocked AER cell formation  
296 (**Fig. S15A**), an effect similar to that reported in AER development in chick embryos (20, 21).  
297 As BMP4 boosts chondrogenesis (**Fig. S12**), which can in turn lead to *Noggin* expression, we  
298 concluded that localised and/or regulated levels of BMP agonist and antagonists are key for  
299 AER cell formation.

300

301 ***FGFR activation negatively regulates progression of chondrogenesis and FGF pathway***  
302 ***operates upstream of Noggin for AER cell formation***

303

304 Regeneration competency in late stage tadpoles was previously shown to be restored via  
305 exogenous application of FGF10, which activates the expression of genes associated with  
306 regeneration and AER cells (10) (**Fig. S16A**). However, the mechanism by which FGF10  
307 regulates the formation of AER cells is not clear. We first asked if all cells in the epidermis are  
308 competent to induce *Fgf8* expression upon *Fgf10* exposure. We examined the spatial  
309 correlation between *Fgf10.L* expressing mesenchymal cells and *Fgf8.L* expressing epithelial  
310 cells in regeneration-competent tadpoles and saw regions in which *Fgf10.L* but not *Fgf8.L* was  
311 present (**Fig. S16B**). Second, when adding FGF10 to regeneration-competent explants, we  
312 observed a slight but not statistically significant increase in AER cell formation on the  
313 amputation plane (**Fig. S16C**), although this signal was confined to the distal epidermis and  
314 did not include a substantial signal at the proximal site of explants (**Fig. S16D**). Collectively,  
315 we concluded that *Fgf10* is not sufficient to induce AER cells across the whole epidermis. We  
316 next sought to evaluate if the effect of *Fgf10* on regeneration is, at least in part, mediated by its  
317 impact on chondrogenesis.

318

319 To test the effect of *Fgf10* on chondrogenesis, we used our *ex vivo* cultures to monitor the  
320 substantial chondrogenesis occurring at the proximal site of explants. Application of FGF10  
321 beads to the proximal site of *ex vivo* cultures, or addition of recombinant FGF10 to their media,  
322 significantly decreased chondrogenesis at the posterior sites in regeneration-restricted explants  
323 (**Fig. S17A**). Conversely, blocking FGFR significantly extended chondrogenesis at the  
324 proximal site of explants (**Fig. S17B-D**). Nonetheless, FGF10 treatment was not sufficient to  
325 induce strong *Fgf8* expression at the proximal site of explants (**Fig. S16D**), presumably due to  
326 abundant antagonist cues. To test this hypothesis, we treated explants with a combination of  
327 FGF10 and anti-NOGGIN antibodies. Strikingly, this combination not only enhanced AER cell  
328 formation at the distal sites, but also induced ectopic *Fgf8.L* expression near the proximal sites  
329 of explants (**Fig. S16D**). Finally, AER cell formation induced by FGF10 addition was cancelled  
330 by the addition of BMP inhibitors (NOGGIN or small molecule inhibitors) (**Fig. S16C**), further  
331 suggesting that FGF10 acts events upstream of potential inhibitory extrinsic cues during AER  
332 cell formation.

333

334 ***Discussion***

335

336 Here, we have used single-cell transcriptional profiling to discriminate injury responses from  
337 regeneration-specific events in *Xenopus* limbs. Consistent with previous observations based on  
338 tissue-level characterisations (4), using the single-cell atlas, we found that the abundance of  
339 AER cells on the amputation plane correlates with regeneration outcome and injury-induced  
340 mesenchymal plasticity.

341

342 Changes in intrinsic properties of mesodermal tissue during development, particularly the loss  
343 of *Fgf10* expression, was suggested to explain regeneration-incompetency (22, 23). Our results  
344 suggest that extrinsic cues from mesodermal tissue also affect regeneration strongly by



345 inhibiting specialised wound epidermis formation, downstream of *Fgf10* signalling.  
346 Specifically, chondrogenic cells are the main source of secreted extrinsic cues (e.g. *Noggin*)  
347 that block AER cell formation. These findings may explain why amputations at proximal  
348 versus distal sites, associated with different stages of chondrogenesis, exhibit different  
349 regeneration outcomes (9).

350

351 Whilst manipulation of chondrogenesis in adult frogs and other regeneration-incompetent  
352 species may lead to novel approaches to promote limb regeneration, it is likely that additional  
353 barriers to regeneration (e.g. scarring and more complex immune responses) will also have to  
354 be overcome. Finally, it is tempting to speculate whether limb regeneration-competent  
355 salamanders can withstand the inhibitory extrinsic cues by having AER cell signals enriched  
356 in mesenchymal rather than epidermal cells, or whether they utilise different mechanisms  
357 owing to distinct limb development mechanisms (24–26). Altogether, our work suggests a new  
358 cellular model of limb regeneration (**Fig 5**), which unites disparate findings in the field, and  
359 suggests that modulation of extrinsic cues impacting on epidermal populations has the potential  
360 to unlock the ability to regrow lost limbs in non-regenerative higher vertebrates.

361

## 362 **References and Notes**

363

- 364 1. Tassava RA, Olsen CL. Higher vertebrates do not regenerate digits and legs because the  
365 wound epidermis is not functional. A hypothesis. *Differentiation*. 1982;22(3):151-155.  
366 doi:10.1111/j.1432-0436.1982.tb01242.x
- 367 2. C. W. Beck, J. C. Izpisua Belmonte, B. Christen, Beyond early development: *Xenopus* as  
368 an emerging model for the study of regenerative mechanisms. *Dev. Dyn.* **238**, 1226–  
369 1248 (2009).
- 370 3. R. A. Tassava, R. M. Loyd, Injury requirement for initiation of regeneration of newt limbs  
371 which have whole skin grafts. *Nature*. **268**, 49–50 (1977).
- 372 4. R. A. Tassava, A. L. Mescher, The Roles of Injury, Nerves, and the Wound Epidermis  
373 during the Initiation of Amphibian Limb Regeneration. *Differentiation*. **4**, 23–24 (1975).
- 374 5. J. N. Dent, Limb regeneration in larvae and metamorphosing individuals of the South  
375 African clawed toad. *J. Morphol.* **110**, 61–77 (1962).
- 376 6. B. Christen, J. M. W. Slack, FGF-8 Is Associated with Anteroposterior Patterning and Limb  
377 Regeneration in *Xenopus*. *Developmental Biology*. **192**, 455–466 (1997).
- 378 7. P. D. Nieuwkoop, J. Faber, *Normal Table of Xenopus Laevis (Daudin): A Systematical and*  
379 *Chronological Survey of the Development from the Fertilized Egg Till the End of*  
380 *Metamorphosis* (Garland Pub., 1994).
- 381 8. H. L. D. Nye, J. A. Cameron, Strategies to reduce variation in *Xenopus* regeneration  
382 studies. *Dev. Dyn.* **234**, 151–158 (2005).

- 383 9. A. D. Wolfe, H. L. D. Nye, J. A. Cameron, Extent of ossification at the amputation plane is  
384 correlated with the decline of blastema formation and regeneration in *Xenopus laevis*  
385 hindlimbs, 17.
- 386 10. H. Yokoyama, H. Ide, K. Tamura, FGF-10 Stimulates Limb Regeneration Ability in  
387 *Xenopus laevis*. *Developmental Biology*. **233**, 72–79 (2001).
- 388 11. G. Lin, Y. Chen, J. M. W. Slack, Imparting Regenerative Capacity to Limbs by Progenitor  
389 Cell Transplantation. *Developmental Cell*. **24**, 41–51 (2013).
- 390 12. B. Boehm, H. Westerberg, G. Lesnicar-Pucko, S. Raja, M. Rautschka, J. Cotterell, J.  
391 Swoger, J. Sharpe, The Role of Spatially Controlled Cell Proliferation in Limb Bud  
392 Morphogenesis. *PLoS Biol.* **8**, e1000420 (2010).
- 393 13. C. Aztekin, T. W. Hiscock, J. C. Marioni, J. B. Gurdon, B. D. Simons, J. Jullien,  
394 Identification of a regeneration-organizing cell in the *Xenopus* tail. *Science*. **364**, 653–  
395 658 (2019).
- 396 14. B. J. Haas, J. L. Whited, Advances in Decoding Axolotl Limb Regeneration. *Trends in*  
397 *Genetics*. **33**, 553–565 (2017).
- 398 15. S. M. Cannata, S. Bernardini, S. Filoni, Regenerative responses in cultured hindlimb  
399 stumps of larval *Xenopus laevis*. *J. Exp. Zool.* **262**, 446–453 (1992).
- 400 16. C. A. D’Jamoos, G. McMahon, P. A. Tsonis, *Wound Repair Regen*, in press,  
401 doi:10.1046/j.1460-9568.1998.60415.x.
- 402 17. C. W. Beck, B. Christen, D. Barker, J. M. W. Slack, Temporal requirement for bone  
403 morphogenetic proteins in regeneration of the tail and limb of *Xenopus* tadpoles.  
404 *Mechanisms of Development*. **123**, 674–688 (2006).
- 405 18. H. Yokoyama, T. Maruoka, H. Ochi, A. Aruga, S. Ohgo, H. Ogino, K. Tamura, Different  
406 Requirement for Wnt/ $\beta$ -Catenin Signaling in Limb Regeneration of Larval and Adult  
407 *Xenopus*. *PLoS ONE*. **6**, e21721 (2011).
- 408 19. E. J. Pearl, D. Barker, R. C. Day, C. W. Beck, Identification of genes associated with  
409 regenerative success of *Xenopus laevis* hindlimbs. *BMC Dev Biol.* **8**, 66 (2008).
- 410 20. Pizette S, Niswander L. BMPs negatively regulate structure and function of the limb  
411 apical ectodermal ridge. *Development*. 1999;126(5):883-894.
- 412 21. Pizette S, Abate-Shen C, Niswander L. BMP controls proximodistal outgrowth, via  
413 induction of the apical ectodermal ridge, and dorsoventral patterning in the vertebrate  
414 limb. *Development*. 2001;128(22):4463-4474.
- 415 22. S. K. Sessions, S. V. Bryant, Evidence that regenerative ability is an intrinsic property of  
416 limb cells in *Xenopus*. *J. Exp. Zool.* **247**, 39–44 (1988).

- 417 23. H. Yokoyama, S. Yonei-Tamura, T. Endo, J. C. Izpisua Belmonte, K. Tamura, H. Ide,  
418 Mesenchyme with fgf-10 Expression Is Responsible for Regenerative Capacity in  
419 Xenopus Limb Buds. *Developmental Biology*. **219**, 18–29 (2000).
- 420 24. M.-J. Han, J.-Y. An, W.-S. Kim, Expression patterns of Fgf-8 during development and limb  
421 regeneration of the axolotl. *Developmental Dynamics*. **220**, 40–48 (2001).
- 422 25. S. Purushothaman, A. Elewa, A. W. Seifert, Fgf-signaling is compartmentalized within the  
423 mesenchyme and controls proliferation during salamander limb development. *eLife*. **8**,  
424 e48507 (2019).
- 425 26. R. N. Christensen, M. Weinstein, R. A. Tassava, Expression of fibroblast growth factors 4,  
426 8, and 10 in limbs, flanks, and blastemas of Ambystoma. *Developmental Dynamics*.  
427 **223**, 193–203 (2002).
- 428 27. E. Becht, L. McInnes, J. Healy, C.-A. Dutertre, I. W. H. Kwok, L. G. Ng, F. Ginhoux, E. W.  
429 Newell, Dimensionality reduction for visualizing single-cell data using UMAP. *Nature*  
430 *Biotechnology*. **37**, 38–44 (2019).
- 431 28. S. Aibar, C. B. González-Blas, T. Moerman, V. A. Huynh-Thu, H. Imrichova, G. Hulselmans,  
432 F. Rambow, J.-C. Marine, P. Geurts, J. Aerts, J. van den Oord, Z. K. Atak, J. Wouters, S.  
433 Aerts, SCENIC: single-cell regulatory network inference and clustering. *Nature*  
434 *Methods*. **14**, 1083–1086 (2017).
- 435 29. A. Butler, P. Hoffman, P. Smibert, E. Papalexi, R. Satija, Integrating single-cell  
436 transcriptomic data across different conditions, technologies, and species. *Nature*  
437 *Biotechnology*. **36**, 411–420 (2018).
- 438 30. A step-by-step workflow for low-level analysis of... | F1000Research, (available at  
439 <https://f1000research.com/articles/5-2122>).
- 440 31. H. M. T. Choi, M. Schwarzkopf, M. E. Fornace, A. Acharya, G. Artavanis, J. Stegmaier, A.  
441 Cunha, N. A. Pierce, Third-generation in situ hybridization chain reaction: multiplexed,  
442 quantitative, sensitive, versatile, robust. *Development*. **145** (2018),  
443 doi:10.1242/dev.165753.
- 444 32. H. M. T. Choi, V. A. Beck, N. A. Pierce, Next-Generation in Situ Hybridization Chain  
445 Reaction: Higher Gain, Lower Cost, Greater Durability. *ACS Nano*. **8**, 4284–4294 (2014).

446 **Acknowledgements:** We thank Katarzyna Kania and the Cambridge Institute Genomics Core  
447 for their support with this work on the 10X-Genomics and sequencing library preparations. The  
448 transgenic testes used in this study was obtained from the European Xenopus Resource Centre,  
449 curated with funding from the Wellcome Trust/BBSRC, and maintained by the University of  
450 Portsmouth, School of Biological Sciences. We thank R. Jones-Green for excellent animal care.  
451 We thank H. Ma for use of her stereomicroscope, and E. Rawlins for use of her Zeiss  
452 Axiolmager compound microscope. We thank B. Steventon, E. Rawlins, and members of the  
453 Marioni and Simons labs for general discussion about the project. We thank R. Butler for  
454 assistance in image analysis.

455

456 **Funding:** C.A. is funded by University of Cambridge and Cambridge Trust. J.J. and J.B.G. are  
457 funded by a grant from the Wellcome Trust (101050/Z/13/Z). T.W.H., J.C.M., and B.D.S. are  
458 funded as part of a Wellcome Strategic Award to study cell fate decisions (105031/D/14/Z).  
459 T.W.H. is also supported by an EMBO Long-Term Fellowship (ALTF 606-2018). B.D.S. also  
460 acknowledges funding from the Royal Society E.P. Abraham Research Professorship  
461 (RP\R1\180165) and Wellcome Trust (098357/Z/12/Z). J.C.M. acknowledges core funding  
462 from the European Molecular Biology Laboratory and Cancer Research UK (A17197). This  
463 work is funded by a grant from the Wellcome Trust (101050/Z/13/Z), Molecular Research  
464 Council (MR/P000479/1), and supported by the Gurdon Institute core grant from Cancer  
465 Research UK (C6946/A14492) and the Wellcome Trust (092096/Z/10/Z).

466 **Author contributions:**

467 Conceptualization: C.A. with contributions from other authors; Methodology: C.A., and  
468 T.W.H. for computational analysis; Software: T.W.H.; Validation: C.A., T.W.H.; Formal  
469 analysis: T.W.H. with help from C.A.; Investigation: C.A.; Resources: J.B.G., J.C.M.; Data  
470 curation: C.A., T.W.H.; Writing – original draft: C.A. with help from J.J.; Writing - review and  
471 editing: C.A., T.W.H., J.J., B.D.S., J.C.M.; Supervision: J.C.M., J.J., B.D.S.; Project  
472 administration: C.A.; Funding acquisition: C.A., J.J., J.B.G., B.D.S., J.C.M.

473

474 **Competing interests:** The authors declare no competing interests.

475 **Data and materials availability:** Sequencing data and processed gene counts are available  
476 on ArrayExpress with the accession number E-MTAB-9104. Analysis scripts are available  
477 at <https://github.com/MarioniLab/XenopusLimbRegeneration2020>. Requests for materials  
478 and code should be addressed to corresponding authors.

479

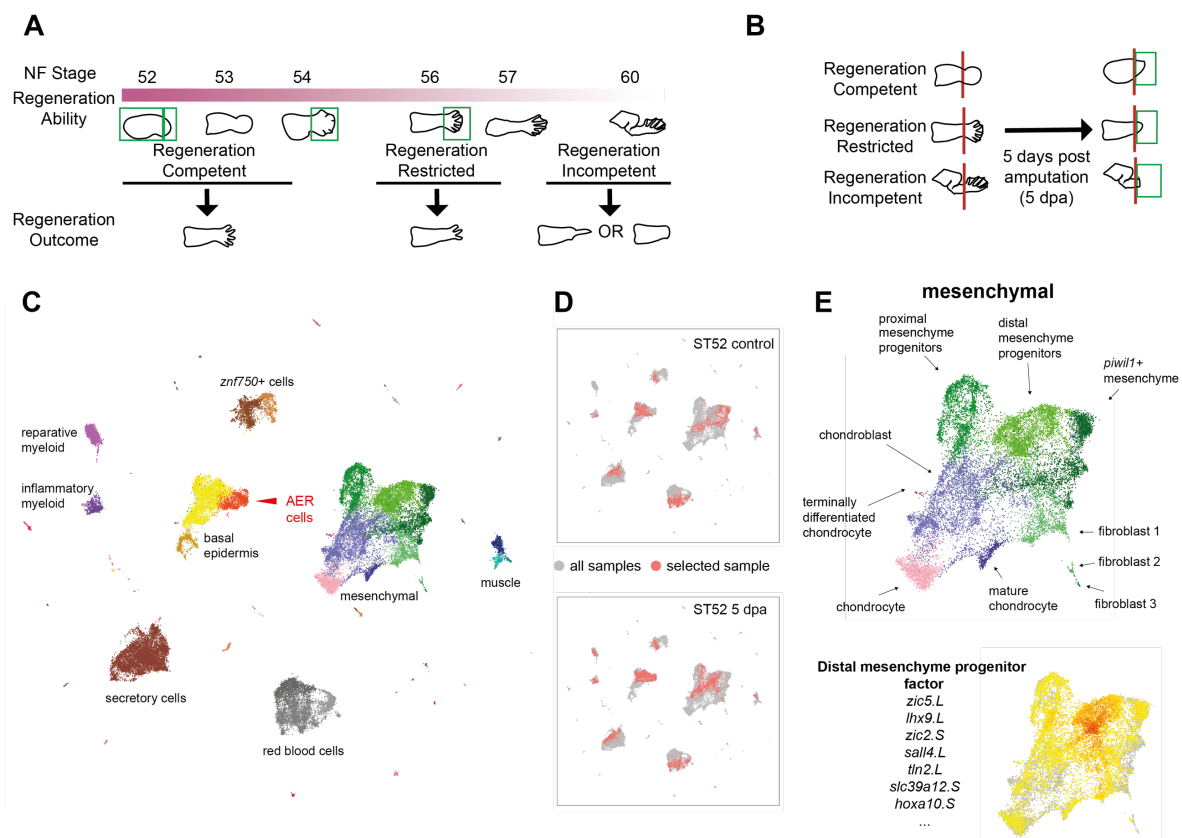

480

481 **Fig 1. Single-cell transcriptomics reveals cellular heterogeneity in developing and**  
 482 **amputated *Xenopus* limbs at different stages of regeneration competence.**

483 **A)** Schematic describing *Xenopus* limb regeneration at different NF Stages. NF Stage ~52-54  
 484 tadpoles are regeneration-competent and amputations result in regeneration of a full limb.  
 485 Regeneration-ability begins to decline at NF Stage ~54. Tadpoles are regeneration-restricted at  
 486 NF ~Stage 56 where 2-3 digits can be regenerated. Beyond NF Stage ~58, tadpoles are  
 487 regeneration-incompetent and amputations result in simple wound healing or unpatterned spike  
 488 formation. Green boxes indicate the samples collected for scRNA-Seq, taken at stages prior to,  
 489 at the onset of and after the loss of regeneration ability. **B)** Schematic describing 5 days post  
 490 amputation (dpa) samples for regeneration-competent, -restricted, and –incompetent tadpoles.  
 491 Green boxes show the samples collected for scRNA-Seq. **C)** An atlas of cell types in intact and  
 492 amputated limbs. Samples from each condition are processed separately for sequencing, and  
 493 are then pooled together for UMAP visualization and clustering. Each dot corresponds to a  
 494 single cell, colours indicate cluster identity, text labels highlight important tissue/cell types.  
 495 See Fig. S3 for full annotation. **D)** Comparisons can be made between conditions to highlight  
 496 transcriptional changes associated with regeneration; here NF Stage 52 amputated limbs  
 497 (lower) are compared to their contralateral control samples (upper). Red dots denote cells in  
 498 the selected sample; grey dots denote cells in all samples. **E)** A diversity of mesenchymal cell  
 499 types is detected in our dataset (upper), together with putative gene expression programs  
 500 identified using unbiased factor analysis (lower).

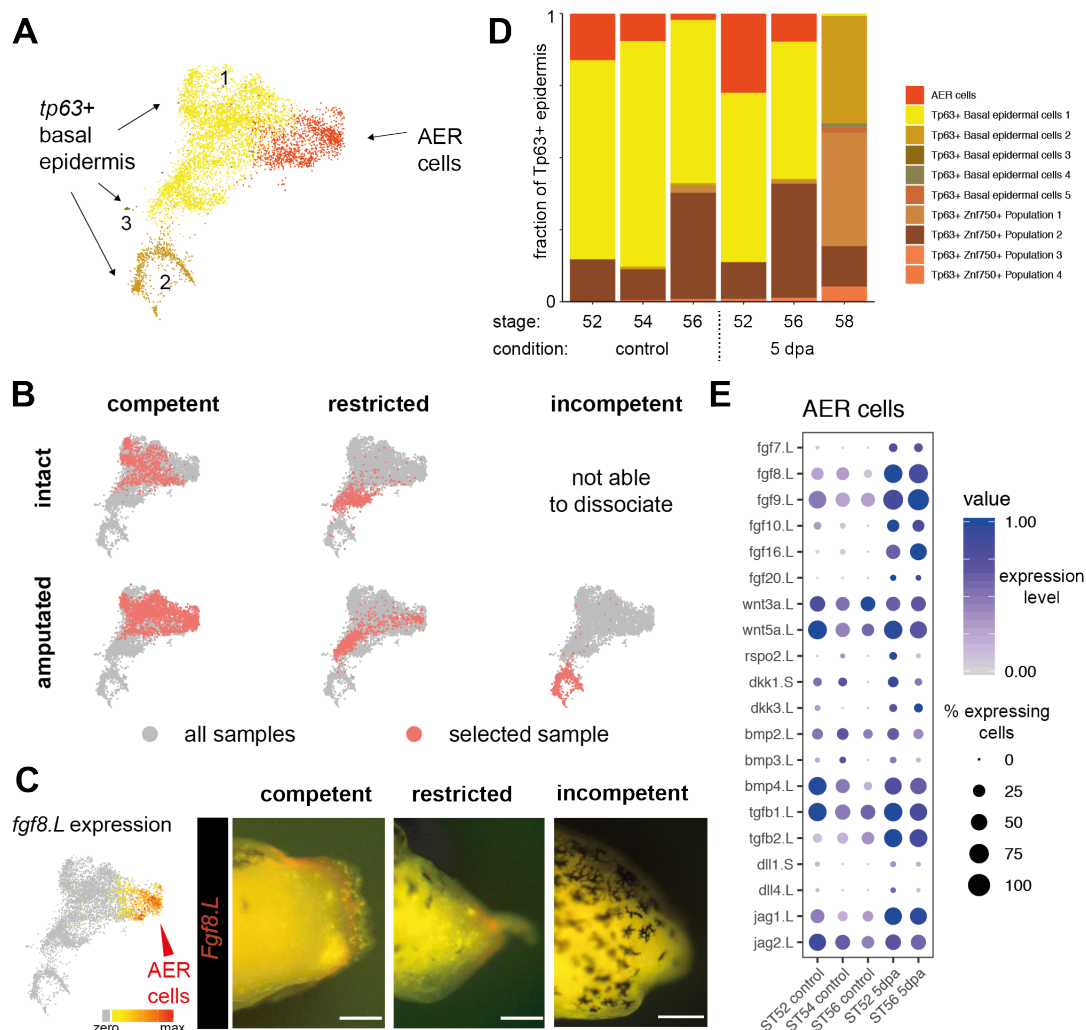

501

502 **Fig 2: Formation of a signalling centre comprising apical-ectodermal-ridge (AER) cells**  
 503 **is associated with the successful regeneration.**

504 **A)** Multiple basal epidermal cell states are detected, including AER cells. **B)** UMAP  
 505 visualisation of basal epidermis reveals that re-establishment of AER cells is associated with  
 506 successful regeneration. Red dots denote cells in the selected sample; grey dots denote cells in  
 507 all samples. **C)** (Left) AER cells express *Fgf8.L*. (Right) Stereomicroscope images of the 5 dpa  
 508 amputation plane of regeneration-competent, restricted, and –incompetent tadpoles. *Fgf8.L*  
 509 (red) expressing AER cells are formed in regeneration-competent and –restricted tadpoles, but  
 510 not in –incompetent tadpoles. Scale bar = 250  $\mu$ m. **D)** Abundance of basal epidermal cell types  
 511 across conditions reveals a correlation between AER abundance and regeneration outcome.  
 512 AER cells are present in intact –competent samples, and are enriched after amputation. A  
 513 similar pattern is seen in -restricted samples, although abundances of AER cells are reduced.  
 514 Very few AER cells are detected in –incompetent tadpoles. **E)** Dot plot showing expression of  
 515 selected ligands for AER cells during development and at 5 dpa regeneration-competent,  
 516 restricted, and –incompetent samples. Dot colour indicates mean expression; dot size  
 517 represents the percentage of cells with non-zero expression.

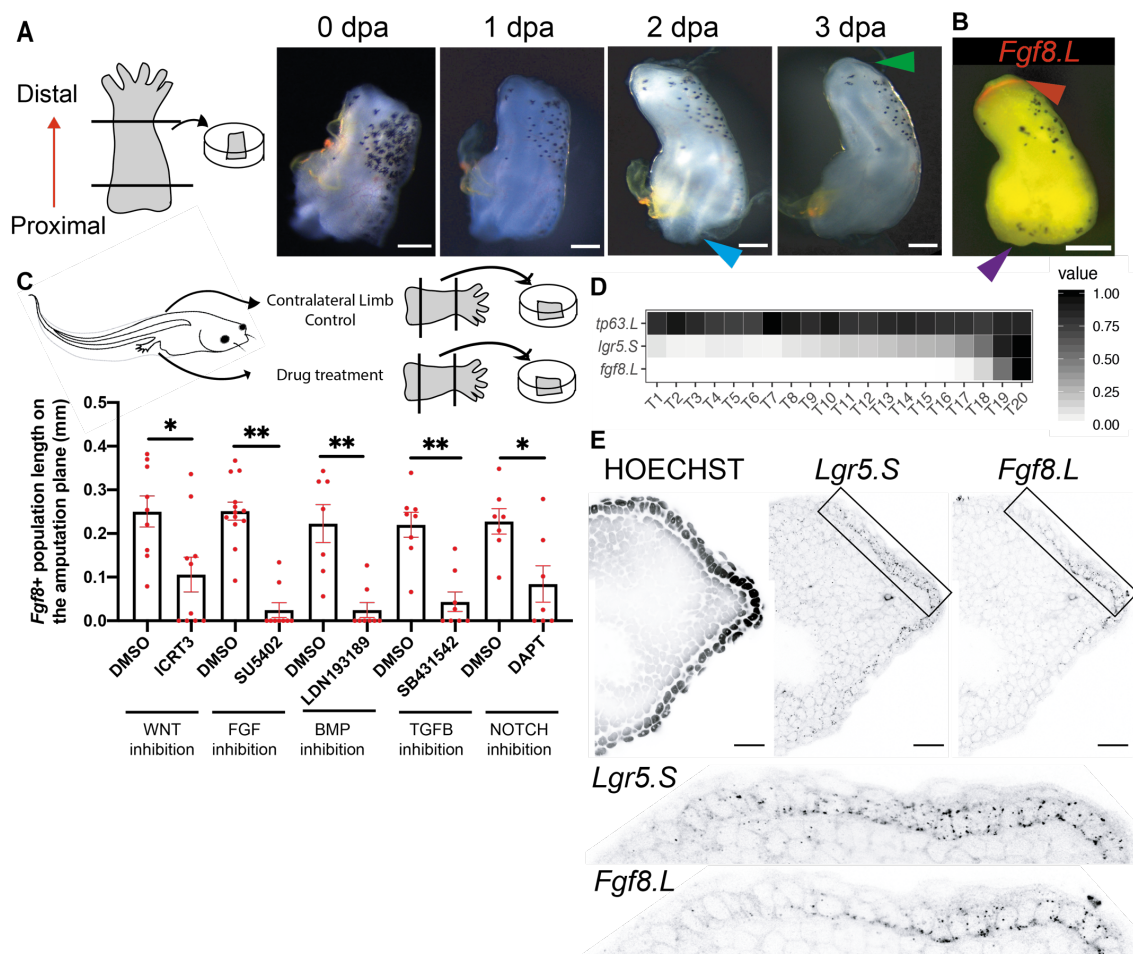

518

519 **Fig 3. Ex vivo regenerating limbs demonstrate that AER cell formation requires**  
 520 **activation of multiple pathways and can form from basal epidermal cells.**

521 **A)** (Left) Schematic for ex vivo regeneration limb culture. (Right) Time-lapse images of a –  
 522 competent explant. The explant grows a cone shape at its distal site reminiscent of in vivo  
 523 regeneration (green arrow), whilst the proximal site shows chondrogenesis (blue arrow).  
 524 Scale= 200  $\mu$ m. **B)** Example image of a –competent explant at 3-day post culture. Distal site  
 525 of explants is *Fgf8.L* positive (red arrow), and proximal site is *Fgf8.L* negative (purple arrow).  
 526 Red, *Fgf8.L* mRNA. Scale= 200  $\mu$ m. **C)** Drug screen to test regulators of AER cell formation.  
 527 (Top) Schematics describing the screen. One limb of a tadpole was used for perturbation and  
 528 the contralateral limb from the same tadpole was used as a control. Samples were treated with  
 529 the indicated drugs for 3 days post culture, and then stained for *Fgf8.L* mRNA. The extent of  
 530 *Fgf8.L* expression along the amputation plane was measured. Sample sizes: ICRT3 total  $n \geq 9$   
 531 from 3 biological replicates; SU5402 total  $n \geq 9$  from 2 biological replicates; LDN193189 total  
 532  $n = 8$  from 3 biological replicates; DAPT total  $n = 7$  from 3 biological replicates.  $P^* < 0.05$ , and  
 533  $P^{**} < 0.001$ . **D)** Factor analysis identifies a putative gene expression trajectory from basal  
 534 epidermal cells to AER cells predicting sequential activation of *Lgr5.S* followed by *Fgf8.L*. **E)**  
 535 A proximal-to-distal gradient of *Lgr5.S* and *Fgf8.L* is observed in vivo, with *Fgf8.L* being  
 536 restricted to the most distal regions of the midline epidermis. Black dots represent HCR mRNA  
 537 signal. Scale = 20  $\mu$ m.

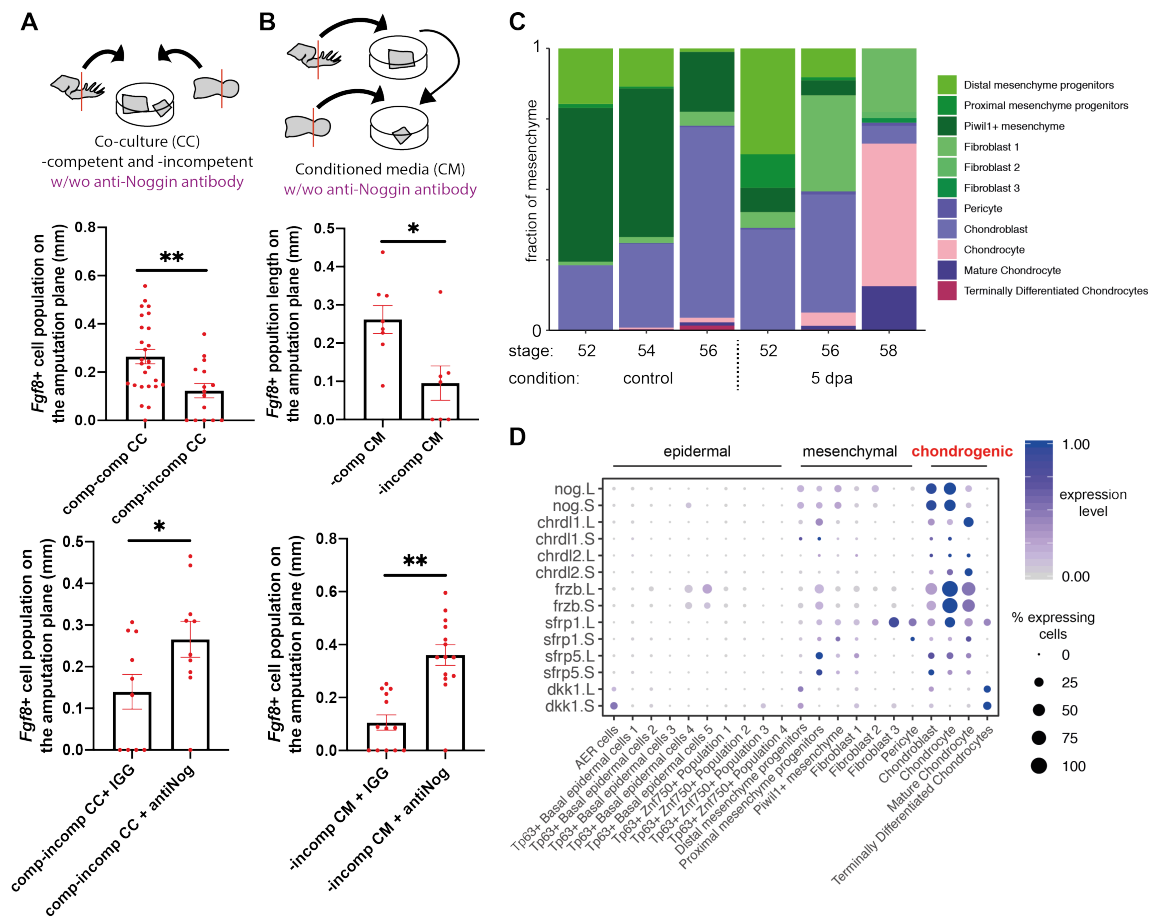

538

539 **Fig 4. Inhibitory factors, such as Noggin, are secreted from chondrogenic populations at**  
 540 **regeneration incompetent stages, and block AER cell formation**

541 **A)** (Top) Schematic describing conditioned media experiments to test the effect of extrinsic  
 542 cues in regeneration-incompetent tadpole limbs. (Mid) Supplying conditioned media (CM)  
 543 from regeneration-incompetent tadpoles to regeneration-competent explants decreases the  
 544 extent of *Fgf8*<sup>L</sup> expression at the amputation plane at 3 dpa. (Bottom) This effect can be  
 545 rescued by adding anti-NOGGIN antibody. -Competent CM to -competent explants: total n=8,  
 546 from 3 biological replicates; -incompetent CM to -competent explants: total n=7, from 3  
 547 biological replicates; -incompetent CM to -competent explants and anti-IGG antibody: total  
 548 n=10, from 3 biological replicates; -incompetent CM and anti-NOGGIN antibody to -  
 549 competent explants: total n=10, from 3 biological replicates.  $P^* < 0.05$ , and  $P^{**} < 0.001$ . **B)**  
 550 (Top) Schematic describing co-culture experiments. (Mid) Co-culturing (CC) -competent  
 551 explants and -incompetent explants decrease the extent of *Fgf8*<sup>L</sup> expression at the amputation  
 552 plane at 3 dpa. (Bottom) This effect can be rescued by adding anti-NOGGIN antibody. -  
 553 Competent and -competent CC: total n=26, from 4 biological replicates; -competent and -  
 554 incompetent CC: and anti-IGG antibody total n=10, from 3 biological replicates; competent  
 555 and -incompetent CC and anti-NOGGIN antibody: total n=10, from 3 biological replicates.  
 556  $P^* < 0.05$ , and  $P^{**} < 0.001$ . **C)** Abundance of mesenchymal populations across conditions  
 557 reveals an enrichment of chondrogenic populations at regeneration-restricted and -incompetent  
 558 stages, in both intact and amputated limbs. **D)** Multiple BMP/WNT antagonists are expressed  
 559 specifically in chondrogenic populations.

560



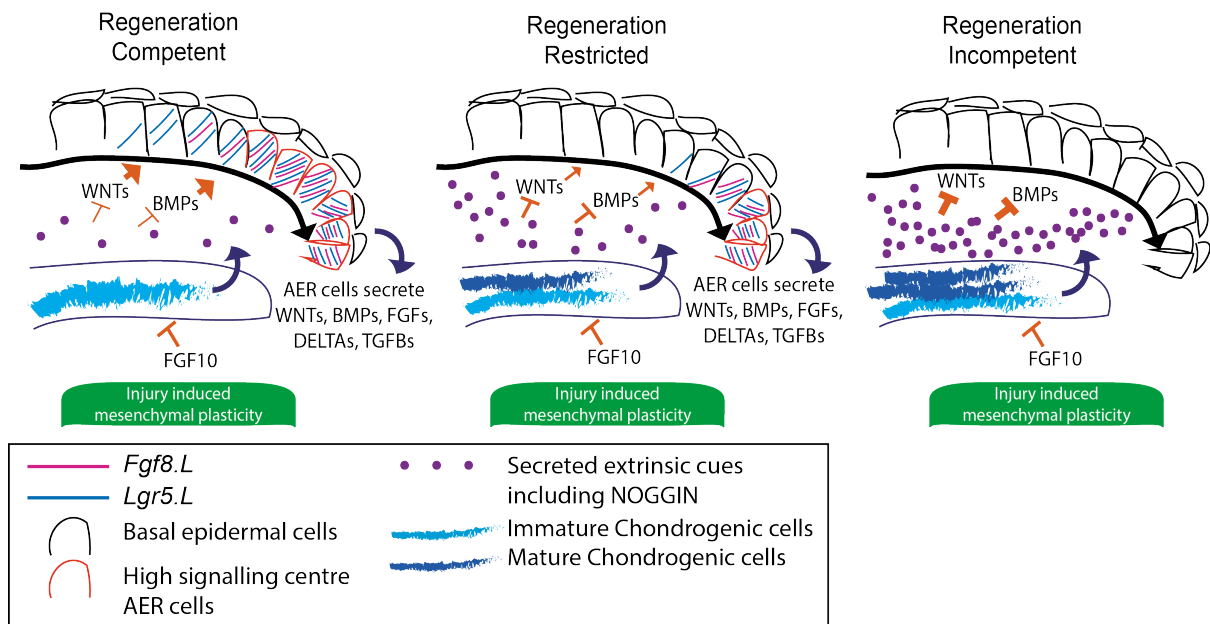

561

562

563 **Fig 5. Chondrogenic progression blocks AER cell formation by modulating extrinsic cues.**

564 Secreted factors such as WNTs and BMPs support AER cell formation at the amputation plane.

565 During development, chondrogenesis leads to the accumulation of secreted inhibitory extrinsic

566 cues including NOGGIN which results in failure to establish AER cells (*Fgf8.L+/Lgr5.S+*).

567 FGF10 can suppress chondrogenesis. Amputations, independent of the regeneration outcome,

568 induce injury-induced mesenchymal transcriptional plasticity.

569

570

571

572

573

574

575

576

577

578

579

580

581

582

583

584

585

586

587

588

589

590 **Supplementary Materials**

591

592 **Secreted inhibitors drive the loss of regeneration competence in**  
593 ***Xenopus* limbs**

594 C. Aztekin<sup>1,2\*</sup>, T. W. Hiscock<sup>1,3\*</sup>, J. B. Gurdon<sup>1,2</sup>, J. Jullien<sup>1,2,4†</sup>, J. C. Marioni<sup>3,5,6†</sup>, B.  
595 D. Simons<sup>1,7,8†</sup>

596

\*Co-first authors.

597

†Corresponding authors; listed in alphabetical order.

598

599 Correspondence to: [jerome.jullien@inserm.fr](mailto:jerome.jullien@inserm.fr) (J.J); [marioni@ebi.ac.uk](mailto:marioni@ebi.ac.uk) (J.C.M);  
600 [bds10@cam.ac.uk](mailto:bds10@cam.ac.uk) (B.D.S.)

601

602

603 **This PDF file includes:**

604

605 Materials and Methods

606

606 Figs. S1 to S17

607

607 Caption for Table S1

608

608 References

609

610 **Other Supplementary Materials for this manuscript include the following:**

611

612

613 Table S1

614

615

616

617

618

619

620

621

622

623

624

625

626

627

628

629

630

631

632

## 633 **Materials and Methods**

634

### 635 ***Tadpole generation and husbandry***

636 Tadpoles were generated and staged as previously described (13). After NF Stage 45, tadpoles  
637 were fed once or twice a day with filamentous blue-green algae (ZM spirulina powder)  
638 suspended in water. Wild-type *Xenopus laevis* were used for experiments unless otherwise  
639 stated. Tadpoles classified as regeneration-competent were NF Stage 52-53, regeneration-  
640 restricted were NF 55-56, and regeneration-incompetent were NF Stage 58-60. Animal  
641 experiments were approved by the University Biomedical Services at the University of  
642 Cambridge and complied with UK Home Office guidelines (Animal Act 1986).

643

### 644 ***Single-cell dissociation, library preparation and sequencing***

645 For developmental samples, tadpoles were killed, and samples were collected at the  
646 aforementioned stages. For amputation/regeneration samples, tadpoles were anaesthetized by  
647 incubating them with 0.1X MMR 0.002% MS222 (A0377876, Acros Organics), placed on a  
648 wet towel and the right hindlimbs were amputated at the presumptive knee/ankle level for  
649 regeneration-competent tadpoles, and at the ankle level for –restricted or –incompetent  
650 tadpoles. Afterwards, the tadpoles were returned to fresh water. At 5 days post amputation  
651 (dpa), tadpoles were killed and the newly generated tissues on the amputation plane were  
652 collected. Contralateral control samples were also collected from these tadpoles, and intact  
653 limb buds or autopods including ankle were collected. For each scRNA-Seq experiment, tissues  
654 were collected from a total of 8-10 tadpoles to reduce variance caused by staging differences.  
655 Dissociations were performed on a pool of 4 limbs in an Eppendorf tube with the following  
656 protocol. First the samples were washed with Ca-Mg free 1X MBS ((Barth-HEPES Saline)  
657 10X stock: 88 mM NaCl, 1 mM KCl, 2,4 mM NaHCO<sub>3</sub>, 0.82mM MgSO<sub>4</sub>.7H<sub>2</sub>O, 0.33mM  
658 Ca(NO<sub>3</sub>)<sub>2</sub>.4H<sub>2</sub>O, 0.41 mM CaCl<sub>2</sub>.6H<sub>2</sub>O, 10 mM HEPES. Add ~3 mL of 10N NaOH to obtain  
659 a pH of 7.4 to 7.6). Samples were then incubated with 1X Trypsin (Sigma, 59427C) in Ca-Mg  
660 free 1X MBS with 0.5 μM EDTA for 10 minutes at room-temperature (RT) on a bench-top  
661 shaker at a speed of 300 rpm. Trypsin reaction was diluted with Ca-Mg free 1X MBS after 10  
662 minutes. Physical dispersion was applied (10-15 times up-down trituration with a pipette) to  
663 samples before, half way, and at the end of trypsinisation. Cells were spun down at 250 g for  
664 5 minutes, the supernatant was taken out, and cells were then resuspended in 1X Ca-Mg free  
665 1X MBS. Cells were passed through a 35 μm diameter cell strainer then stained with 20 μM  
666 Hoechst 33342 (Sigma, 2261) in 1X Ca-Mg free MBS for 10-15 minutes, and Hoechst positive  
667 cells were sorted using a Sony SH800s Cell Sorter. scRNA-seq libraries were generated using  
668 10X Genomics (v3 chemistry) and sequenced on an Illumina Novaseq 6000 SP flow cell.

669

### 670 ***scRNA-seq: data processing***

671 Output files from 10X Genomics were processed using CellRanger v3.0.2, with sequences  
672 mapped to the *Xenopus laevis* 9.1 genome (Xenbase,  
673 <ftp://ftp.xenbase.org/pub/Genomics/JGI/Xenla9.1/Xla.v91.repeatMasked.fa.gz> and  
674 [ftp://ftp.xenbase.org/pub/Genomics/JGI/Xenla9.1/1.8.3.2/XL\\_9.1\\_v1.8.3.2.allTranscripts.gff  
675 3.gz](ftp://ftp.xenbase.org/pub/Genomics/JGI/Xenla9.1/1.8.3.2/XL_9.1_v1.8.3.2.allTranscripts.gff3.gz)). Raw counts were normalized by cell library size, and then converted to TPX (transcripts  
676 per 10<sup>4</sup>). Cell calling was performed using CellRanger with default parameters. We further

677 filtered the data according to library size, discarding cells with a total UMI count in the lowest  
678 quartile. We note that the main cell types and transcriptional changes remained unchanged if  
679 we omitted this cell-filtering step, although the clustering and visualization appears less robust  
680 (Fig. S4).

681

#### 682 ***scRNA-seq: feature selection***

683 Highly variable genes (HVGs) were selected for clustering and visualization as described  
684 previously (13) (Fano factor > 65<sup>th</sup> percentile, mean expression > 5<sup>th</sup> percentile and mean  
685 expression < 80<sup>th</sup> percentile). Our initial analysis revealed that visualization and clustering was  
686 strongly influenced by cell cycle state (Fig. S2). To further refine the set of HVGs, we  
687 performed factor analysis with the aim of removing genes significantly associated with the cell  
688 cycle. Specifically, non-negative matrix factorization was performed on the cosine normalized,  
689 log<sub>2</sub>-transformed normalized counts matrix, using k = 30 components (R package *nmlm*).  
690 Factors were manually annotated according to their expression on the UMAP projection, and  
691 by inspection of the highest gene loadings for each factor; 2 factors corresponded to the cell  
692 cycle. To minimize the effect of the cell cycle signature on projection/clustering, we identified  
693 genes associated with these cell cycle factors (top 10% gene loadings for each factor) and  
694 removed these from the set of HVGs.

695

#### 696 ***scRNA-seq: visualization and clustering***

697 Data were projected onto two dimensions using the UMAP algorithm (27), with log<sub>2</sub>-  
698 transformed HVGs, cosine distance as a similarity measure, and parameters k = 15, min\_dist =  
699 0.2. Clustering was performed as described previously (13). Briefly, we constructed a graph  
700 using the UMAP function *fuzzy\_simplicial\_set* with k = 10 nearest-neighbors, and then  
701 performed graphical clustering using the walktrap algorithm (*cluster\_walktrap* from R package  
702 *igraph*, with steps = 10).

703

#### 704 ***scRNA-seq: gene set enrichment and cell cycle analysis***

705 Single cell gene set enrichment scores were calculated with the *AUCell* R package (28), using  
706 HVGs as the background gene set. Cell cycle phase was inferred using *CellCycleScoring* (R  
707 package *Seurat*) (29).

708

#### 709 ***scRNA-seq: annotation of cell-types***

710 Cell type annotation was performed by manually comparing cluster-specific gene expression  
711 patterns (computed using *findMarkers* in R package *scrn* (30)) with known cell type markers  
712 from the literature. Many clusters could be assigned to a well-characterized, functional cell  
713 type (e.g. *Satellite cell*). Other clusters could not be unambiguously identified, but were  
714 assigned a broad label together with a numeric identifier (e.g. *Blood 1*). Finally, a few clusters  
715 remain unannotated (e.g. *Unknown 1*). Dotplots of key marker genes of each cell type are  
716 provided in Fig. S5.

717

#### 718 ***scRNA-seq: gene expression visualization***

719 Gene expression in individual cells is visualized on the UMAP projection with points colored  
720 according to expression level (log<sub>10</sub>-transformed). Gene expression across groups of cells (e.g.

721 for different clusters, or for different stage tadpoles) is shown using dotplots colored by mean  
722 expression (log<sub>10</sub>-transformed, normalized to group with maximal expression). We can detect  
723 alleles from both the Large (*Gene.L*) or Short (*Gene.S*) chromosomes present in the  
724 pseudotetraploid *Xenopus laevis* genome. In some figures, we report expression from both the  
725 large and short allele; in others, we report whichever allele has higher expression for brevity.

726

### 727 ***Regeneration assay and bead experiments***

728 Affi-gel blue gel beads (Bio-rad, **1537301**) were incubated with 0.1% BSA or 1 µg recombinant  
729 human FGF10 (R&D, 345-FG) in 1-2 µl 0.1% BSA overnight at 4 degrees. Tadpoles were  
730 anaesthetized with 0.002% MS222, placed on a wet towel, and both right and left hindlimbs  
731 were amputated from ankle level in either –restricted or –incompetent tadpoles. 3-4 beads were  
732 placed on the amputation plane of the right hindlimb. Left hindlimbs served as an internal  
733 control for the experiments. Please note that pushing the bead deep in the tissues at the  
734 amputation site was avoided as much as possible, and beads were gently positioned instead.  
735 Tadpoles were monitored on a wet towel for 3-5 minutes then tadpoles that kept the beads were  
736 placed in fresh water. Tadpoles were killed in between 18-21 dpa to assess the regeneration  
737 outcome. The difference in the number of digits or digit-like structures between the right to the  
738 left limb was quantified for each tadpole.

739

### 740 ***Whole-mount mRNA visualisation, hybridization chain reaction (HCR), with or without*** 741 ***combination of immunofluorescence or histology***

742

#### 743 HCR on whole limb or tail samples

744 HCR was applied as described before (31) with modifications, and materials for HCR were  
745 purchased from Molecular Instruments Inc unless otherwise stated. Limb and tail samples were  
746 fixed with 4% formaldehyde in 1X PBS for 40-60 minutes, permeabilized in 70% ethanol in  
747 1X PBS for 2-4 hours, washed briefly with 1X PBS and collected in Eppendorf tubes. These  
748 procedures were carried out on a rotator at RT. The supernatant was taken out, 500 µl wash  
749 solution (Molecular Instruments Inc.) was added, and samples were rotated at RT for 5 minutes.  
750 The supernatant was taken out and replaced by 400-500 µl hybridization buffer (Molecular  
751 Instruments Inc.) for a 30 minutes incubation at 37 degrees. In parallel, the probe solution was  
752 prepared by diluting mRNAs targeting probes to 30-40 nM in 200 µl hybridization buffer and  
753 incubated for 30 min at 37 degrees. The hybridization buffer from samples were taken out and  
754 probe solution was placed on samples for a 12-16 hours incubation at 37 degrees. Subsequently,  
755 the samples were washed 2 x 20 minutes with wash buffer, and 2x30 minutes with 5x SSC-T  
756 at RT. To visualize probes, amplification solution was prepared by first heating to 95 degrees  
757 for 90 seconds the fluorophore attached hairpins pairs (h1 and h2 hairpins) that matches to the  
758 probes. Hairpins were then left in dark at RT for 30 minutes. Afterwards, final amplification  
759 solution was prepared at 40-60 nM h1 and h2 in 200 µl amplification buffer. Afterwards,  
760 samples were placed in amplification solution at room temperature, protected from light, for  
761 12-16 hours on a rotator. Samples were washed with 2x20 min SSC-T. Samples were then put  
762 in 1X PBS.

763

764 Whole-mount HCR samples imaging: For stereomicroscope or confocal imaging of whole

765 samples, the samples were mounted in 0.6%-0.8% ultra-low gelling temperature agar (Sigma,  
766 A5030) in 1X PBS.

#### 767 Sectioning of samples after HCR:

768 In the subsequent step of the protocol, the samples were protected from light to preserve the  
769 HCR signal. The samples were incubated in 15% sucrose in 1X PBS at RT for 1 hour, then  
770 30% sucrose in 1X PBS at 4 degrees overnight. Samples were then placed in O.C.T. solution  
771 and incubated at -80 overnight. Samples were cryosectioned to 5  $\mu$ m thickness, stained with  
772 20  $\mu$ M Hoechst (Sigma, 2261) in 1X PBS at RT for 10 minutes and imaged.

773

#### 774 Immunostaining

775 After sectioning of HCR stained limb, the samples were processed for immunostaining.  
776 Samples were blocked with 50% Cas-Block (Invitrogen, 008120) in 1X PBS-T (1X PBS + 0.1  
777 Tween-100) and incubated for 30 minutes in room temperature without rotating. Samples were  
778 then incubated with antibodies (listed below) at 4 degrees overnight without rotating. Samples  
779 were washed with PBS-T for 2x10 minutes, blocked by 50% Cas-Block in 1X PBS-T for 30  
780 minutes, and incubated with secondary antibodies (listed below) for 1 hour, all these steps were  
781 carried out at RT without rotating. Samples were washed with 1X PBS-T for 2x10 minutes and  
782 2x20 minutes 1X PBS at RT without rotating. After antibody staining, samples were stained  
783 with Hoechst and washed with 1x5 min 1X PBS at RT without rotating. Samples were mounted  
784 in 80% Glycerol in 1X PBS with a coverslip and imaged.

785

786 Tail whole-mount HCR staining can be combined with whole-mount immunofluorescence by  
787 following the above immunofluorescence protocol except that the mounting of whole-tails  
788 were done in ultra- low gelling temperature agar for imaging.

789

790 HCR probes and Hairpins: Probes for *Fgf8.L*, *Dpt.L*, *Htra3.L*, *Prrx1.L* and *Sp9.L* were  
791 purchased from Molecular Instruments Inc.. Probes were designed against the full-length  
792 *Xenopus Lgr5.S*, *Msx1.L*, and *Fgf10.L* mRNA sequence as described by (32). HCR Hairpins  
793 were purchased from Molecular Instruments Inc.

794

795 Primary antibodies, and working dilutions: TP63 [4A4] (Abcam, ab735, 1:200), B-CATENIN  
796 (Abcam, ab6302, 1:2000), E-CADHERIN (5D3, DSHB, 1:10), ITGB1 (8C8, DSHB, 1:10),  
797 anti-EGFP (Abcam, ab13970, 1:500).

798 Secondary antibodies: goat anti-chicken IgY (H+L) secondary antibody, Alexa Fluor 488  
799 (Invitrogen, A11039, 1:500), goat anti-mouse IgG (H+L) cross-adsorbed ReadyProbes  
800 secondary antibody, Alexa Fluor 594 (Invitrogen, R37121, 1:500). goat anti-mouse IgG (H+L)  
801 cross-adsorbed ReadyProbes secondary antibody, Alexa Fluor 488 (Invitrogen, R37120,  
802 1:500).

803 Leica SP8 upright confocal microscope with a 40x/1.3 HC PL Apo CS2 Oil objective was used  
804 for all confocal images except for Fig. S8B images which were taken with Leica SP8 inverted  
805 confocal microscope with a 20x/0.75 HC PL Apo CS2 Multi. LAS X was used for setting tiled  
806 images, and 20% overlap between tiles were used. Limb whole-mount HCR images were taken  
807 via a Leica stereomicroscope equipped with a DFC7000 T camera. Fiji was used for maximum  
808 projection of z-stacks and to adjust contrast to highlight biological relevance. If needed, images  
809 were cropped, flipped, and/or rotated to highlight biological relevance.

810 Histological staining can be done on top of cryosectioned HCR samples. Briefly, samples were  
811 stained with hematoxylin and eosin according to manufacturer`s protocol (Abcam, ab245880),  
812 afterwards samples were stained for Alcian Blue (Sigma, B8438) according to manufacturer`s  
813 protocol. Histology images were taken on a Zeiss AxioImager compound microscope.

814

### 815 ***Ex vivo limb culture method to assess AER cell formation and proximal chondrogenesis***

816 Limbs were first amputated from presumptive knee/ankle level for – competent and ankle level  
817 for –restricted or –incompetent tadpoles. The distal parts of these amputated explants were then  
818 removed and the remaining proximal segment was placed in 1000, 500, 200 µl explant media  
819 (L-15 (Thermo, 11415064) 1X Antibiotic-Antimycotic (Thermo, 15240062), 20% Fetal  
820 Bovine Serum Superior (Sigma, S0615)) in 12, 24, or 96-well plates, respectively. Explants  
821 were cultured for 3 days without changing the media. After 3 days, to quantify AER cell  
822 formation the explants were fixed and proceeded to HCR protocol; to quantify proximal  
823 chondrogenesis the explants were fixed with 4% formaldehyde, mounted in 0.6% Low-Melt  
824 agar, and directly imaged via Stereomicroscopy. Explants emit autofluorescence. Though the  
825 abundant HCR signal can be seen despite the autofluorescence, to discriminate the HCR signal  
826 from autofluorescence in finer detail, sample images were taken in red and green channel  
827 separately with the same exposure and gain settings, and then merged in Fiji. In merged images,  
828 the background signal due to autofluorescence was visualized as yellow and the HCR signal  
829 was either red or green. As AER cells were largely detected as a monolayer population, AER  
830 cell formation was calculated by measuring the length of the *Fgf8.L* signal on the amputation  
831 plane using Fiji segmented line option. The proximal chondrogenesis can be visually  
832 distinguished, and to determine the chondrogenesis length, chondrogenic structure length from  
833 top to bottom was also measured using Fiji. Samples where a clear chondrogenesis was not  
834 visible were omitted from further analysis. These images were taken in brightfield imaging and  
835 measurements were done in Fiji.

836

837 For drug and recombinant protein treatments, the explants were placed in culture media  
838 containing the following small molecules concentration or recombinant protein amounts,  
839 unless otherwise stated: 100 µM ICRT3 (Sigma, SML0211), 100 µM SU-5402 (Sigma,  
840 SML0443), 50 µM SB-505124 (Sigma, S4696), 100 µM DAPT (Sigma, D5942), 2.5 µM LDN-  
841 193189 (Stemgent, 04-0074), 500 ng human recombinant FGF10 (R&D, 345-FG), 1.25 µg  
842 human recombinant NOGGIN (R&D 6057-NG), and 500 ng human recombinant BMP4  
843 (R&D, 314-BP). Drugs were prepared in DMSO, and recombinant proteins were prepared in  
844 0.1% BSA. Small molecule experiments were conducted in 24-well plate. Recombinant protein  
845 experiments were done in 96-well plate. Max 5-6 explants were placed in 24-well plates. 1

846 explant was put in one well of 96-well plate for recombinant protein treatments. In all chemical  
847 and recombinant protein perturbation experiments, one limb of the same animal was subjected  
848 to the perturbation, and the contralateral limb served as a control. These control explants were  
849 exposed to solution containing matching DMSO or BSA concentration in 1X PBS for chemical  
850 or recombinant protein perturbations, respectively. Perturbation and control samples were  
851 pooled separately at the end of experiments and proceeded with staining.

852

### 853 ***EdU Labelling***

854 *Ex vivo* limbs were cultured with 10  $\mu$ M EdU (Thermo, C10337) for 3 days in dark foiled  
855 cover. Afterwards, samples were fixed, and *Fgf8.L* mRNA was stained using the HCR protocol,  
856 followed by cryosectioning, as described above. Sections were subjected to Click-It reaction  
857 as described in manufacturer's protocol (Thermo, C10337). Hoechst was added at the end of  
858 the protocol. Samples were visualized by confocal microscopy as described above. (1) *Fgf8.L*  
859 positive cells, and (2) EdU positive and *Fgf8.L* positive cells on the amputation plane were  
860 manually counted, and the percentage of EdU positive *Fgf8.L* positive cells were calculated for  
861 each sample.

862

### 863 ***Bead experiment for proximal chondrogenesis***

864 Beads were prepared as described above. Explants from  $\alpha$ -restricted tadpoles were harvested as  
865 described above and beads were implanted on the proximal site of explants. At 3 dpa, explants  
866 that did not contain bead at their proximal site anymore (presumably due to repelling) were  
867 omitted from further analysis. At 3 dpa, samples were imaged without fixation and the extent  
868 of chondrogenesis was measured by Fiji.

869

### 870 ***DiO Labelling***

871 DiO (DiO'; DiOC<sub>18</sub>(3) (3,3'-Dioctadecyloxacarbocyanine Perchlorate), Thermo,  
872 D275) was prepared by dipping a tip in the DiO containing powder tube, and placing the tip  
873 in a 10  $\mu$ l 100% ethanol containing Eppendorf. A glass needle tip was then dipped in the diluted  
874 DiO solution and harvested *ex vivo* limbs were labelled on a wet towel. These cultures were  
875 placed in *ex vivo* culture media and explants were imaged every day with a stereomicroscope.

### 876 ***Ex vivo limb co-culture, and conditioned media experiments***

877 For co-culture experiments, one  $\alpha$ -competent and one  $\alpha$ -incompetent limb explants were  
878 incubated together in 200  $\mu$ l explant media in a well of 96-well plate. For antibody experiments,  
879 one limb of each animal served as a control and was incubated with 1  $\mu$ g Rabbit-IGG isotype  
880 control antibody (ab37415) while the contralateral limb was incubated with 1  $\mu$ g anti-NOGGIN  
881 antibody (ab16054). Antibodies and media were only added at the beginning of the cultures  
882 and were not replaced during the experiment.

883

884 For conditioned media experiments, conditioned media supplying and receiving explants were  
885 prepared separately. Supplying explants were prepared one day before harvesting receiving  
886 explants and incubated in 200  $\mu$ l explant media in a well of 96-well plate. After one day, media  
887 from the supplying explant was collected and used to culture the newly harvested receiving  
888 explant, and a fresh media was added for supplying explant. This change of media procedure



889 was repeated for 3 days. For antibody experiments, supplying explant media was collected and  
890 pre-incubated with 1  $\mu$ g antibodies for 25-30 minutes at RT on a rotator, then the pre-incubated  
891 media was placed on the receiving explants.

892

### 893 ***Replicate information and statistical tests***

894 Sample sizes were not pre-determined in any experimental setup. In this work, biological  
895 replicates refer to samples obtained from multiple animal batches and to experiments carried  
896 out different days. In all experiments, wild-type tadpoles were used from tanks that contain  
897 multiple batches (tadpoles raised from different father and/or mother). In all explant  
898 perturbation experiments, samples were compared to their contralateral controls, and a Mann  
899 Whitney U test was used to determine statistical significance. For regeneration and bead  
900 experiments, t-test was used.

901

### 902 ***Data availability***

903 Code is available at <https://github.com/MarioniLab/XenopusLimbRegeneration2020>.  
904 Sequencing data, together with processed counts matrices, are available on ArrayExpress with  
905 the accession number E-MTAB-9104. We provide an interactive online tool to explore our  
906 dataset <https://marionilab.cruk.cam.ac.uk/XenopusLimbRegeneration/>

907 .

908

909

910

911

912

913

914

915

916

917

918

919

920

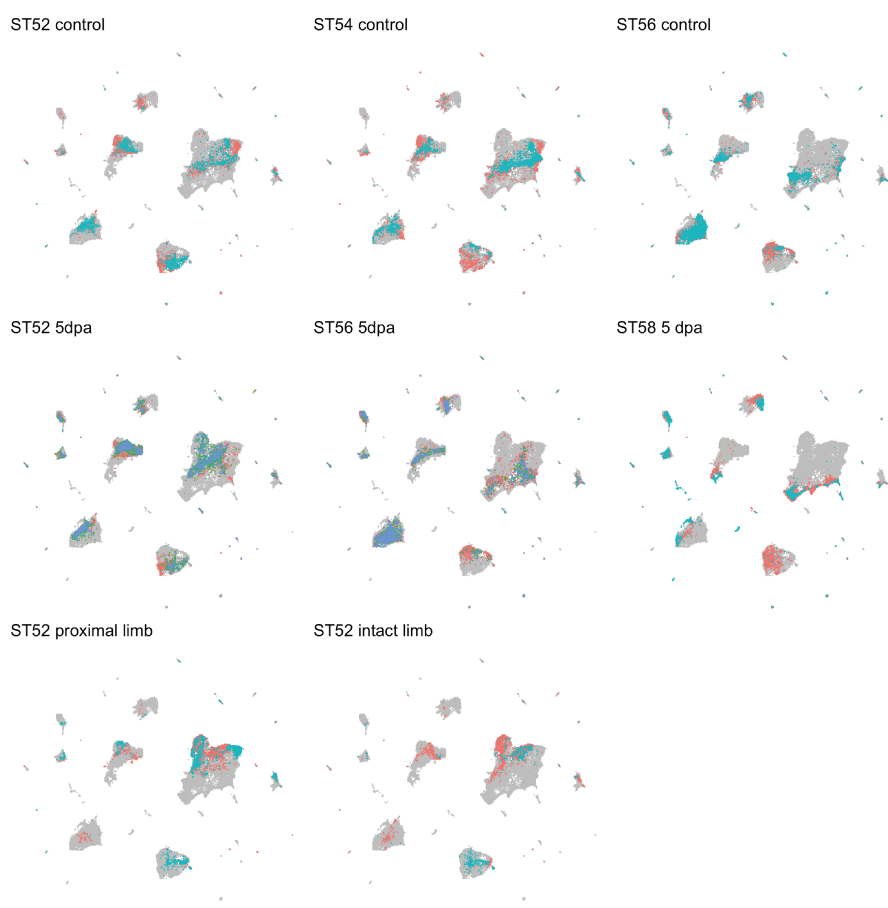

921  
922  
923  
924  
925  
926  
927  
928  
929  
930  
931  
932  
933  
934  
935  
936  
937  
938  
939  
940  
941

**Fig S1: Contribution of different conditions to the pooled UMAP projection**

UMAP visualization of cells from all conditions and replicates, allowing the identification of transcriptional changes that are consistent across replicates. Grey dots: cells from all samples; red, blue, green dots: cells from different biological replicates for the selected sample.

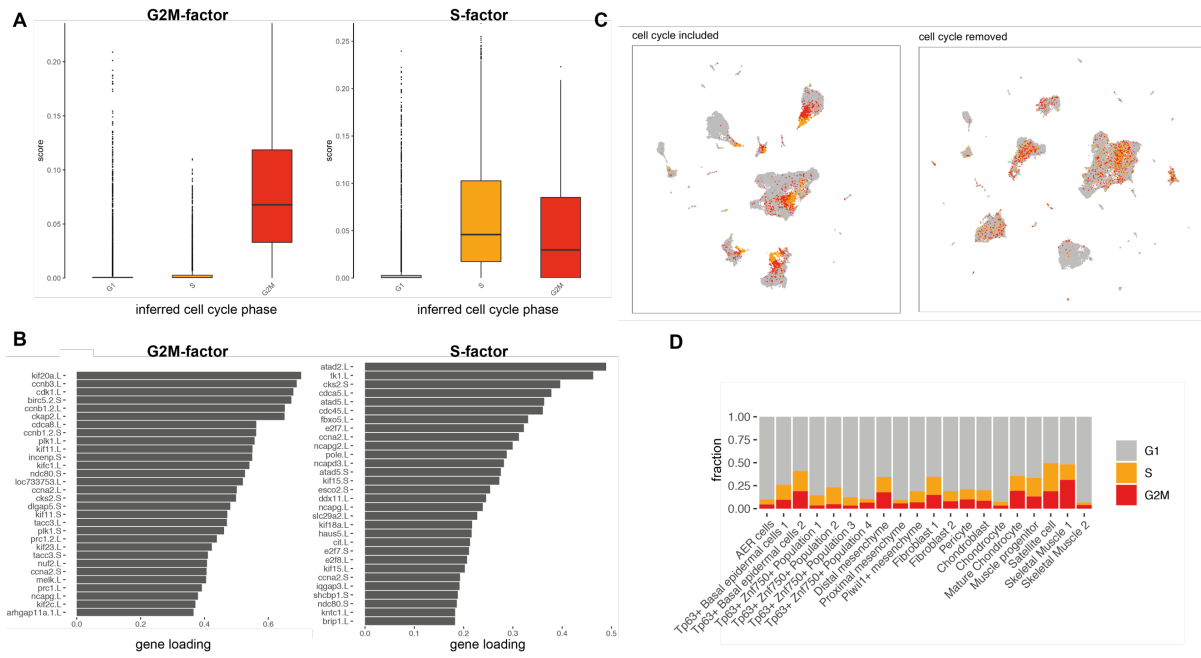

942

943 **Fig S2: Detection and removal of the cell cycle signature**

944 **A)** Unbiased factor analysis identified two factors that correspond to computationally-inferred  
 945 cell cycle phases (G2M-factor, left; S-factor, right). **B)** Factor loadings for the top 30 genes  
 946 associated with cell cycle factors. **C)** Removal of genes with high loadings for either G2M- or  
 947 S-factors significantly reduces the influence of cell cycle phase on the UMAP projection. Dot  
 948 colour indicates inferred cell cycle phase. **D)** Inferred cell cycle states for selected cell types.

949

950

951

952

953

954

955

956

957

958

959

960

961

962

963

964

965

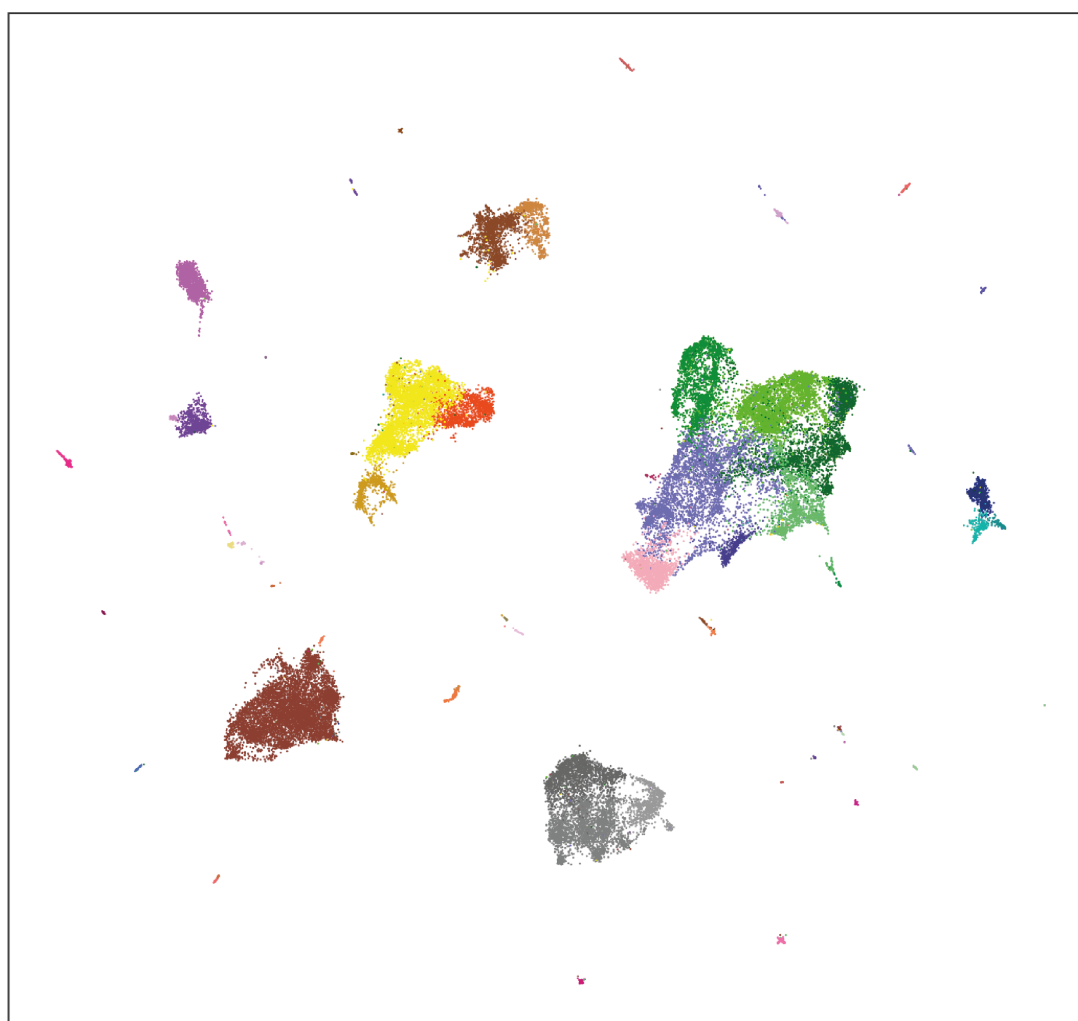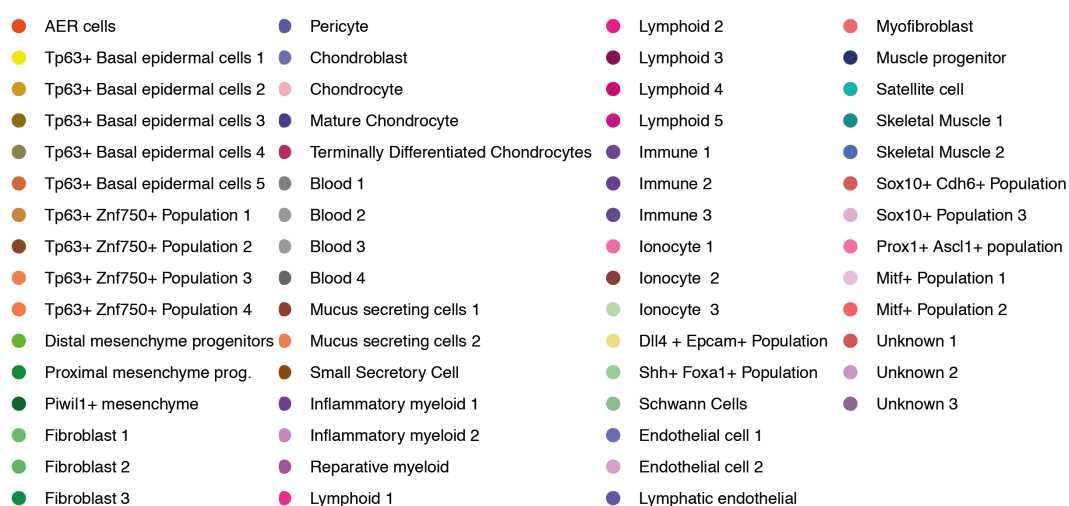

966

967 **Fig S3. An atlas of cell types in developing and amputated limbs at different stages of**  
 968 **regeneration-competence**

969 Pooled UMAP visualization of *Xenopus* limb cells, with colours representing distinct cluster  
 970 identities.

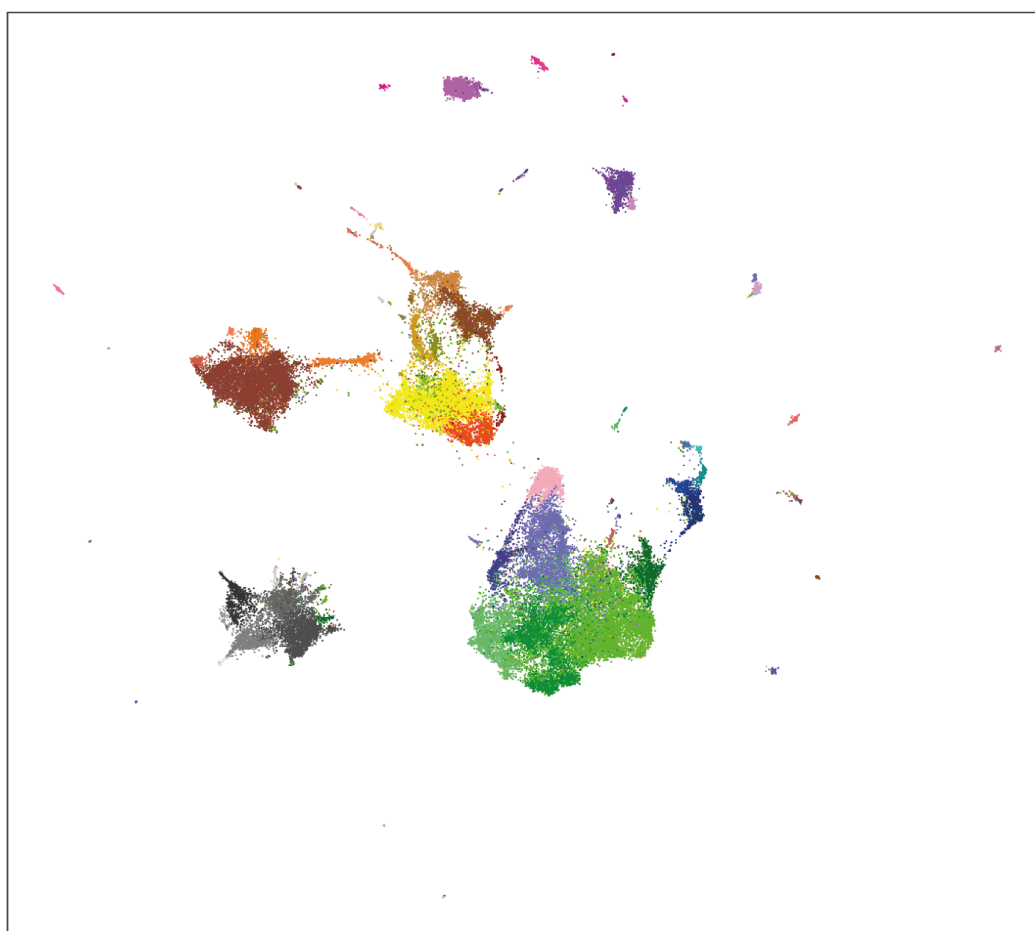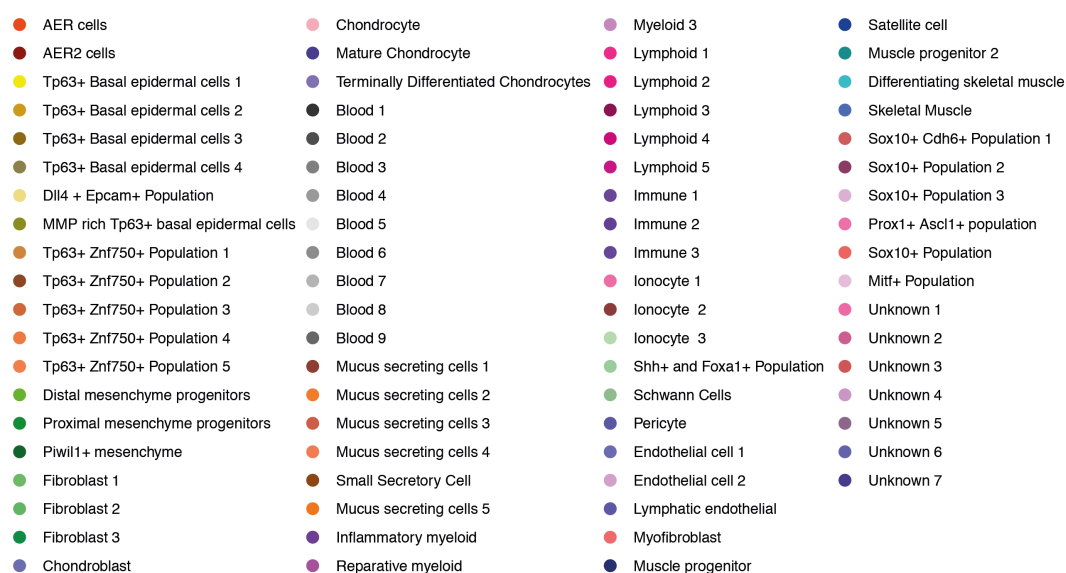

971

972 **Fig S4. An expanded atlas of the *Xenopus* limb using less stringent cell filtering protocols**

973 Pooled UMAP visualization and clustering of all barcodes that are identified as cells using

974 cellRanger with default parameters. The majority of transcriptional states are similar to Fig S3,

975 although a fraction of low-UMI mesenchymal cells appear mislocalized across the atlas.

976

977

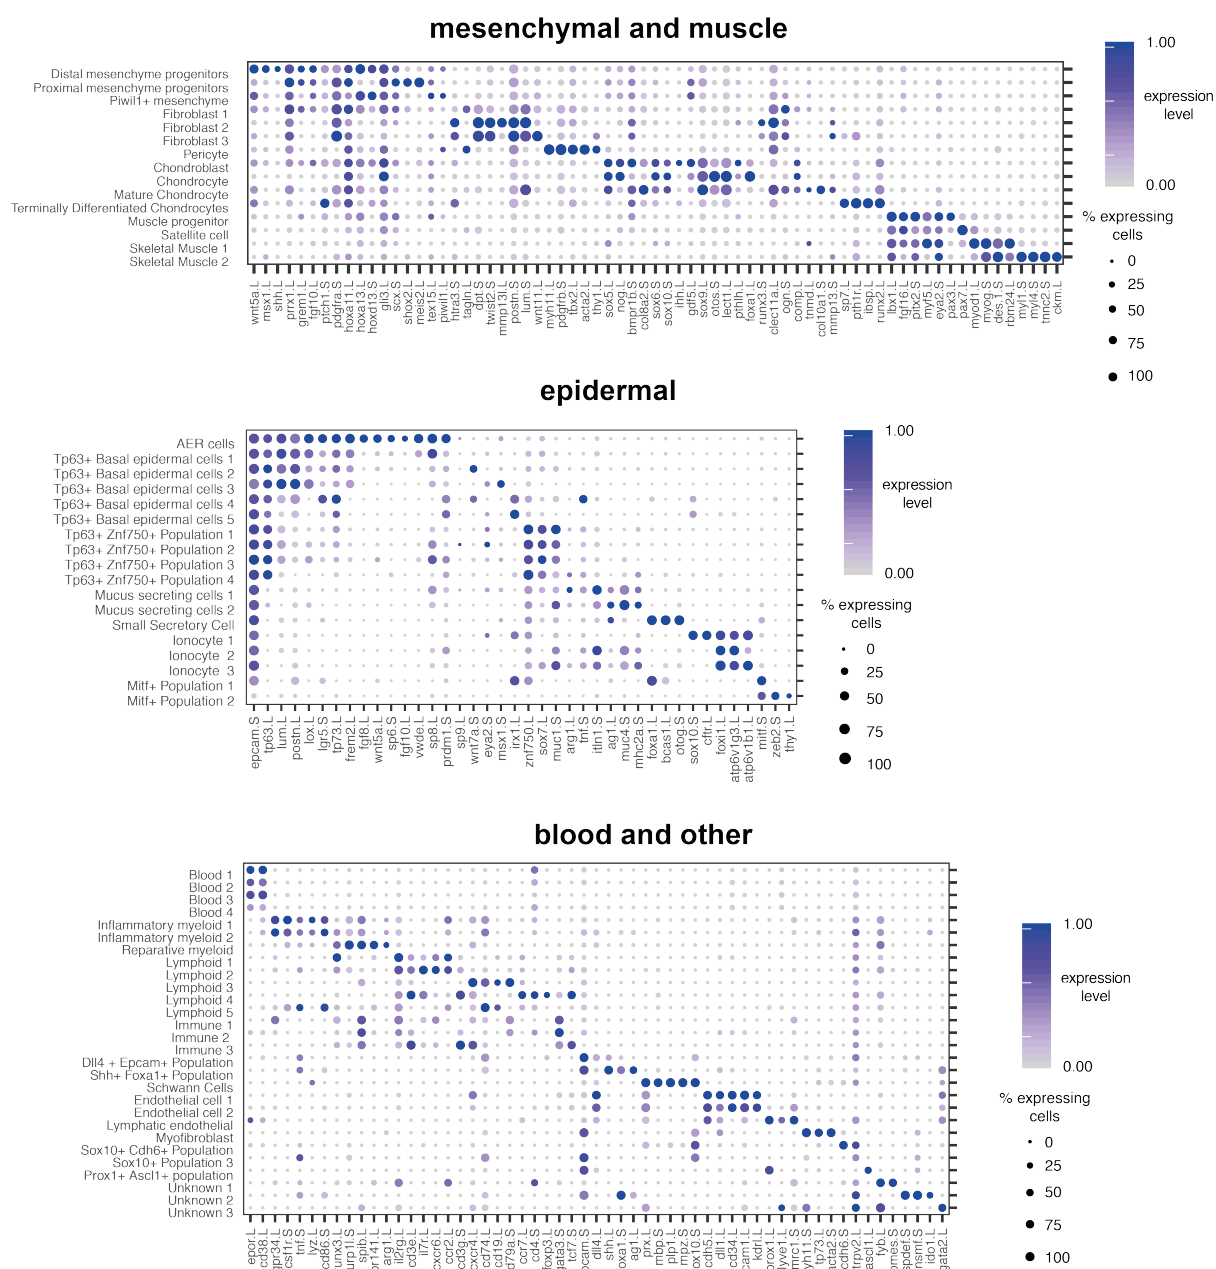

978  
979  
980  
981  
982  
983  
984  
985  
986  
987  
988

**Fig S5: Annotation of cell types using known markers of cell identity**

Dotplots showing marker genes for each of the 61 cell types in our atlas. For ease of presentation, we group cell types into three broad categories: mesenchymal and muscle (top), epidermal (middle), blood and other (bottom). Dot colour denotes mean expression level within the cluster; dot size denotes the percentage of cells within the cluster with non-zero expression.

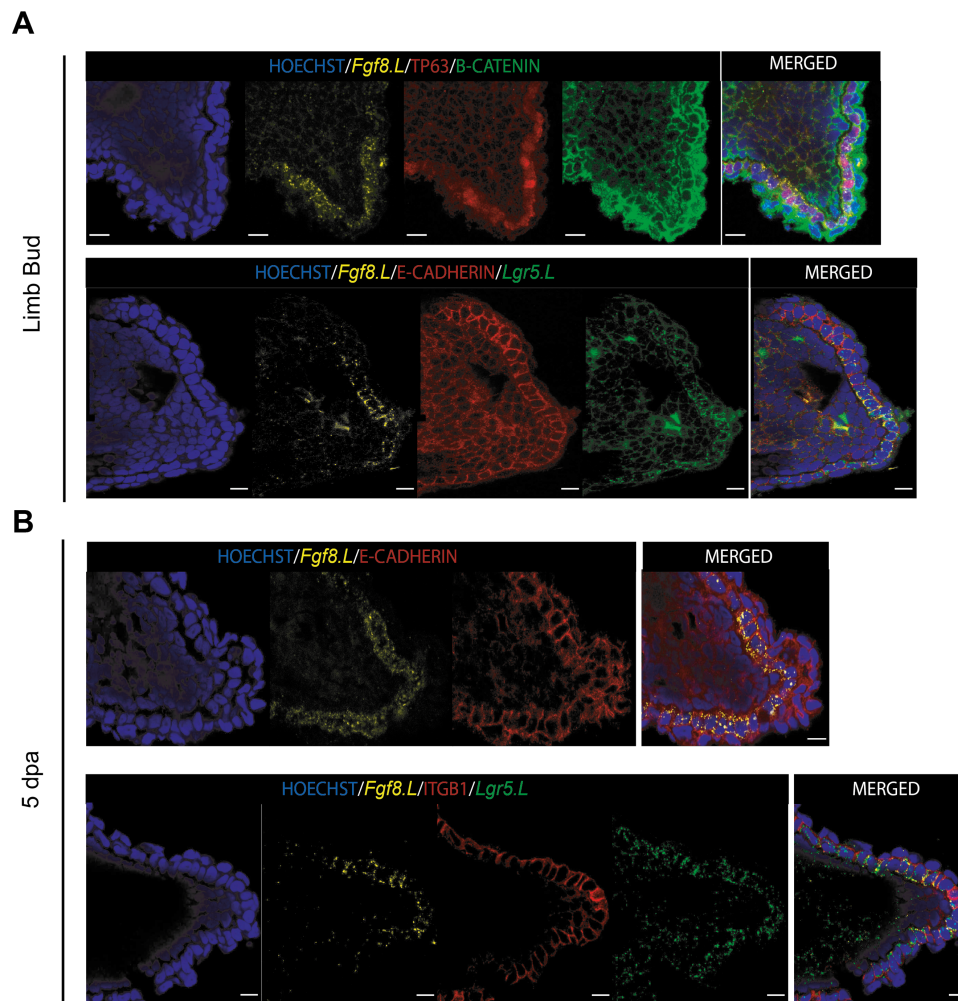

989

990 **Fig S6. AER cells are largely found as cuboidal monolayer cells showing apical-basal**  
991 **polarity.**

992 AER cells were visualised during limb development (A) and at 5 dpa (B) in regeneration-  
993 competent tadpoles by labelling *Fgf8.L* mRNA. AER cells are largely present as monolayer  
994 cuboidal basal epidermal cells with apical-basal polarity. A simple squamous layer is present  
995 above AER cells, and cells with mesenchymal morphology are located underneath AER cells.  
996 From the proximal to distal midline of the epidermis, *Lgr5.S* expression is first detected,  
997 followed by *Fgf8.L* mRNA expression. Both *Fgf8.L* and *Lgr5.S* are expressed at high levels at  
998 the tip of limbs. AER cells show similar cuboidal morphology during development and  
999 regeneration. Basal epidermal cells are morphologically similar based on Hoechst and  
1000 membrane markers, and *Fgf8.L* detection is required to detect AER cell. Row 1: Blue, Hoechst;  
1001 Yellow, *Fgf8.L* mRNA; Red, TP63; Green, B-catenin. Row 2: Blue, Hoechst; Yellow, *Fgf8.L*  
1002 mRNA; Red, E-Cadherin; Green, *Lgr5.S* mRNA. Row 3: Blue, Hoechst; Yellow, *Fgf8.L*  
1003 mRNA; Red, E-Cadherin. Row 4: Blue, Hoechst; Yellow, *Fgf8.L* mRNA; Red, ITGB1; Green,  
1004 *Lgr5.S* mRNA. Scale bars = 10  $\mu$ m.

1005

1006

1007

1008

1009

1010

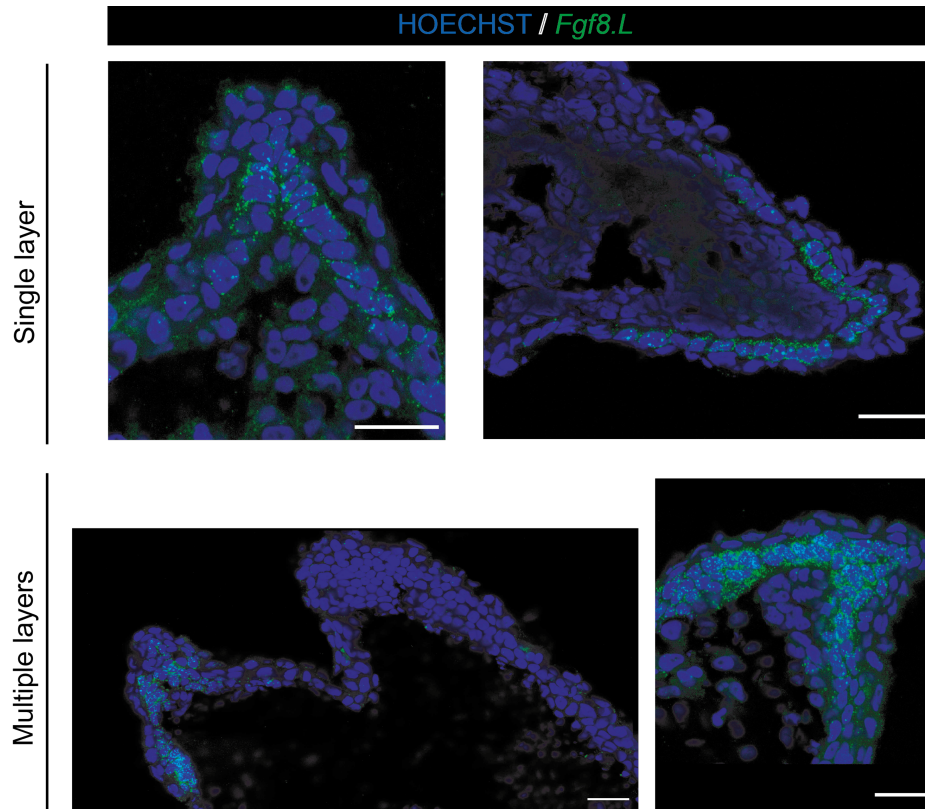

1011

1012 **Fig S7. AER cells can be mono- or multi-layered structures.**

1013 *Fgf8.L* images of sectioned 5 dpa samples from regeneration –competent (top) and –restricted

1014 (bottom) samples. Morphology of AER cells (*Fgf8.L*+) can vary between sections and samples.

1015 Top left, AER cells are seen as single monolayer largely cuboidal although some have higher

1016 height to width ratio. Top right, AER cells are seen as single monolayer largely cuboidal cells.

1017 Bottom left, AER cells can be seen as multi-layered population that is not covering the whole

1018 amputation plane. Bottom right, AER cells can be seen as multi-layered population covering

1019 the amputation plane. Blue, Hoechst; Green, *Fgf8.L* mRNA. Scale bars = 25  $\mu$ m.

1020

1021

1022

1023

1024

1025

1026

1027

1028

1029

1030

1031

1032



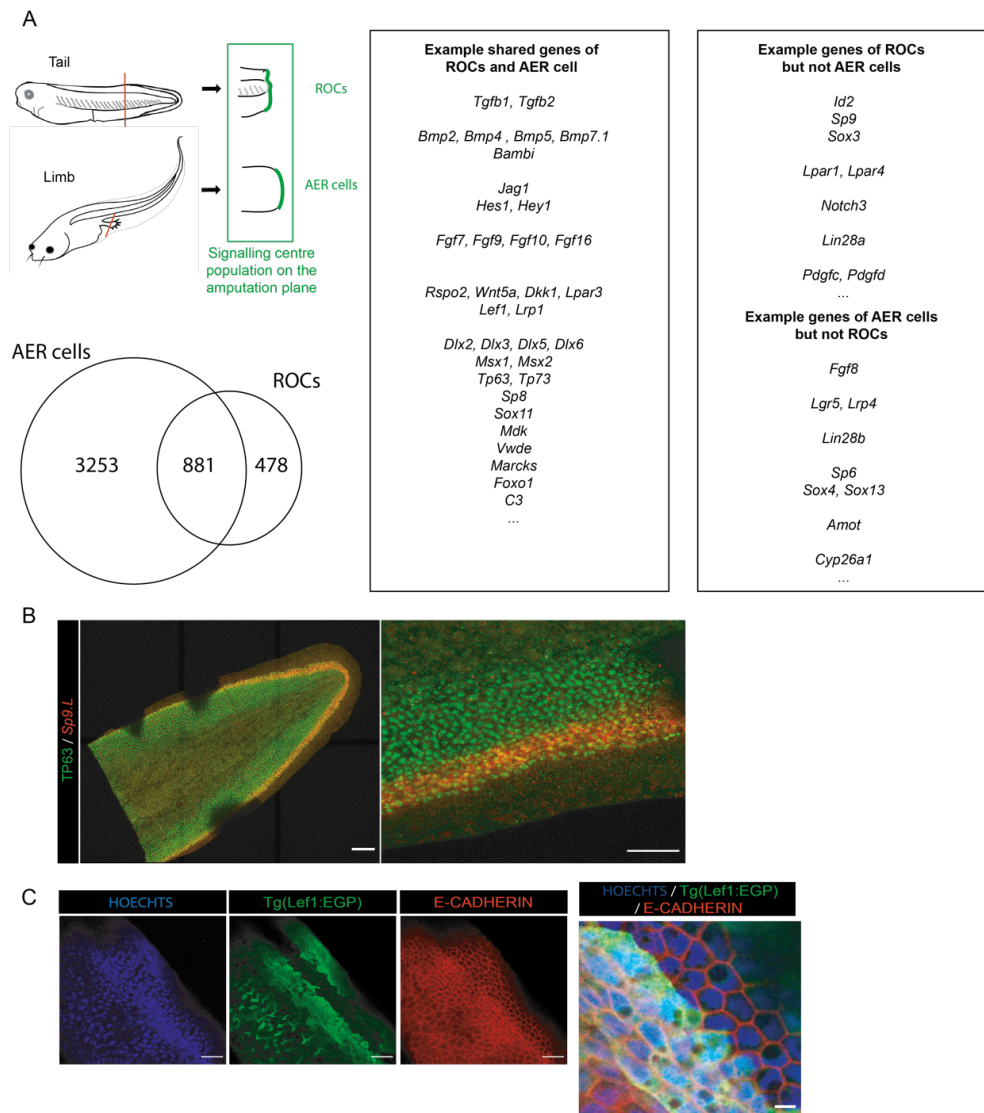

1033

1034 **Fig S8. Specialised wound epidermis of tail and limb regeneration share some**  
 1035 **transcriptional similarities while presenting different cellular morphology.**

1036 (Left) A signalling centre population serving as the specialised wound epidermis is associated  
 1037 with *Xenopus* tail and limb regeneration. However, tail uses regeneration-organising-cells  
 1038 (ROCs) (13) while limb uses AER cells for this purpose. Both AER cells and ROCs share the  
 1039 expression of many genes highlighting their similarity, although there are some genes that are  
 1040 unique to each population. AER- and ROC-specific genes were identified as genes significantly  
 1041 upregulated relative to other basal epidermal cells. (Right) A select number of genes,  
 1042 specifically ligands and transcription factors that are associated with regeneration, are  
 1043 highlighted. (B) ROCs and AER cells show different morphologies (please see Fig. S6 for AER  
 1044 cells). ROCs were visualized by staining NF Stage 40 by *Sp9.L* mRNA expression (highly  
 1045 specific for ROCs (13)) and TP63 immunolabelling for whole tail (Left) and zoomed in version  
 1046 (Right). In the zoomed in version for staining *Sp9.L* shows two level of expression in ROCs: a  
 1047 single outer layer of *Sp9.L* low cells, and multiple inner layers of *Sp9.L* high cells. Please note  
 1048 that this is not whole bottom-top image of a tail as evidenced by absence of TP63 staining in  
 1049 the in middle part of the tissue. Red, *Sp9.L* mRNA; Green, TP63. Scale bars= (left) 250  $\mu$ m,

1050 (right) 100  $\mu\text{m}$ . (C) ROCs are visualized using the *pbin7LEF:GFP* line, as defined previously  
1051 (13), and E-CADHERIN staining was used to delineate cell shape. Inner layers of ROCs have  
1052 flattened cell shape while the outside layer ROCs exhibit more square-like shape. ROCs do not  
1053 have branched nuclei, unlike fin cells. Blue, Hoechst; Green, EGFP; Red, E-cadherin. Scale  
1054 bars= 10  $\mu\text{m}$ .

1055

1056

1057

1058

1059

1060

1061

1062

1063

1064

1065

1066

1067

1068

1069

1070

1071

1072

1073

1074

1075

1076

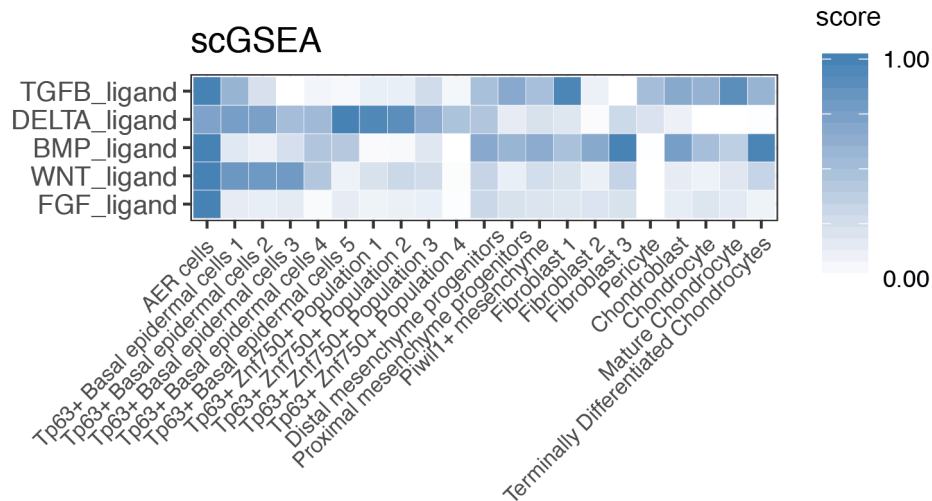

1077

1078 **Fig S9. AER cells are a signalling centre population**

1079 Heatmap showing single-cell gene enrichment scores for ligands from the main signaling  
1080 pathways are shown for epidermal cell types. AER cells have high signal center properties as  
1081 they express high levels of TGF- $\beta$ , Delta, BMP, WNT, and FGF ligands.

1082

1083

1084

1085

1086

1087

1088

1089

1090

1091

1092

1093

1094

1095

1096

1097

1098

1099

1100

1101

1102

1103

1104

1105

1106

1107

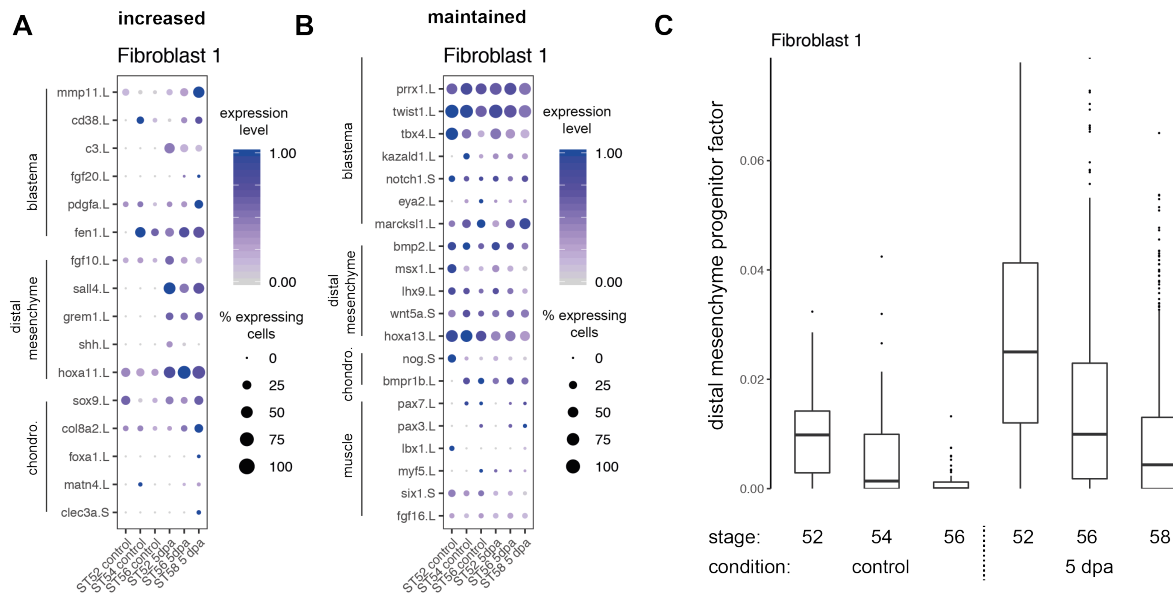

1108

1109 **Fig S10. A subset of fibroblasts express dedifferentiation and blastema genes**  
 1110 **independently of the regeneration-outcome**

1111 Expression of genes and putative gene sets associated with regeneration in the Fibroblast 1  
 1112 cluster, visualized using dotplots and factor analysis. **(A)** Expression of specific genes that  
 1113 increase upon amputation regardless of stage. **(B)** Expression of specific genes that are  
 1114 expressed in intact limbs and are maintained after injury. **(C)** Following amputation, the distal  
 1115 mesenchyme factor increases in Fibroblast 1 cells across all stages.

1116

1117

1118

1119

1120

1121

1122

1123

1124

1125

1126

1127

1128

1129

1130

1131

1132

1133

1134

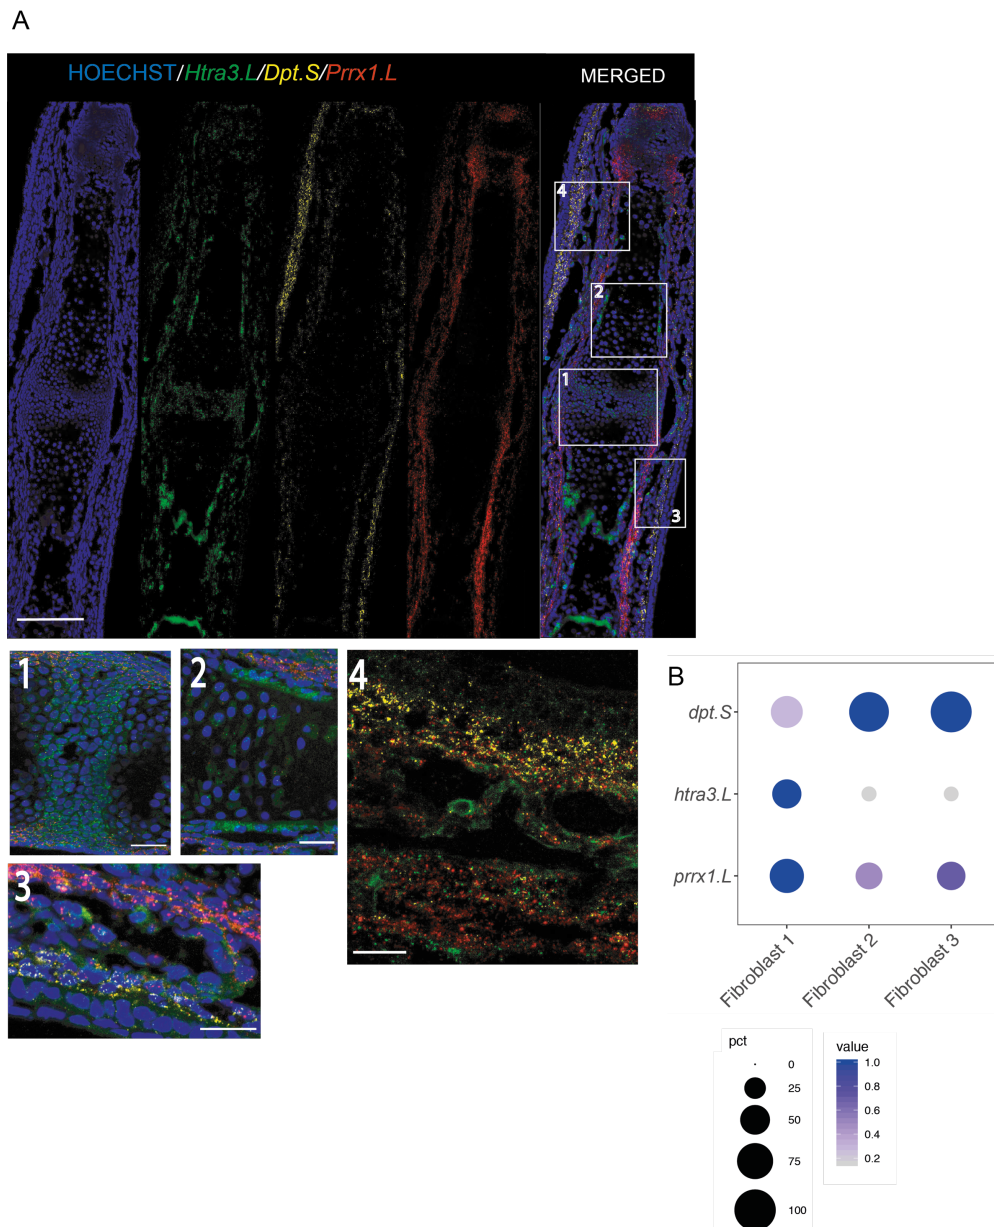

1135

1136 **Fig S11. Fibroblast 1 cluster cells are largely found beneath skin cells and nearby**  
 1137 **perichondrial cells.**

1138 (A) (Top) Confocal images of a Stage 56 digit stained against *Htra3.L*, *Prrx1.L*, and *Dpt.S*.  
 1139 Cells expressing *Htra3.L*/*Prrx1.L*/*Dpt.S* are found underneath the skin regions and nearby  
 1140 perichondrium regions. (Bottom) Zoomed in version of selected areas show: (1) joint forming  
 1141 regions are enriched for *Htra3.L* expression; (2) Inner perichondrial regions are enriched for  
 1142 *Htra3.L* and outer perichondrial regions are enriched for *Prrx1.L* expression. (3-4) Outerlayers  
 1143 of dermal fibroblast area enriched for *Dpt.S* and lower levels of *Prrx1.L* and *Htra3.L*. Inner  
 1144 layers of dermal fibroblasts/nearby perichondrial regions are enriched for higher *Prrx1.L* and  
 1145 lower *Dpt.S* and *Htra3.L* expressions. Blue, Hoechst; Green, *Htra3.L* mRNA; Red, *Prrx1.L*  
 1146 mRNA; Yellow, *Dpt.S* mRNA. Scale= 125  $\mu$ m for top images, 25  $\mu$ m for bottom no 1-3, and  
 1147 20  $\mu$ m for bottom no 4. (B) Dot plot showing expression of *Htra3.L*, *Prrx1.L*, and *Dpt.S* for  
 1148 Fibroblast 1, 2, and 3 clusters.

1149

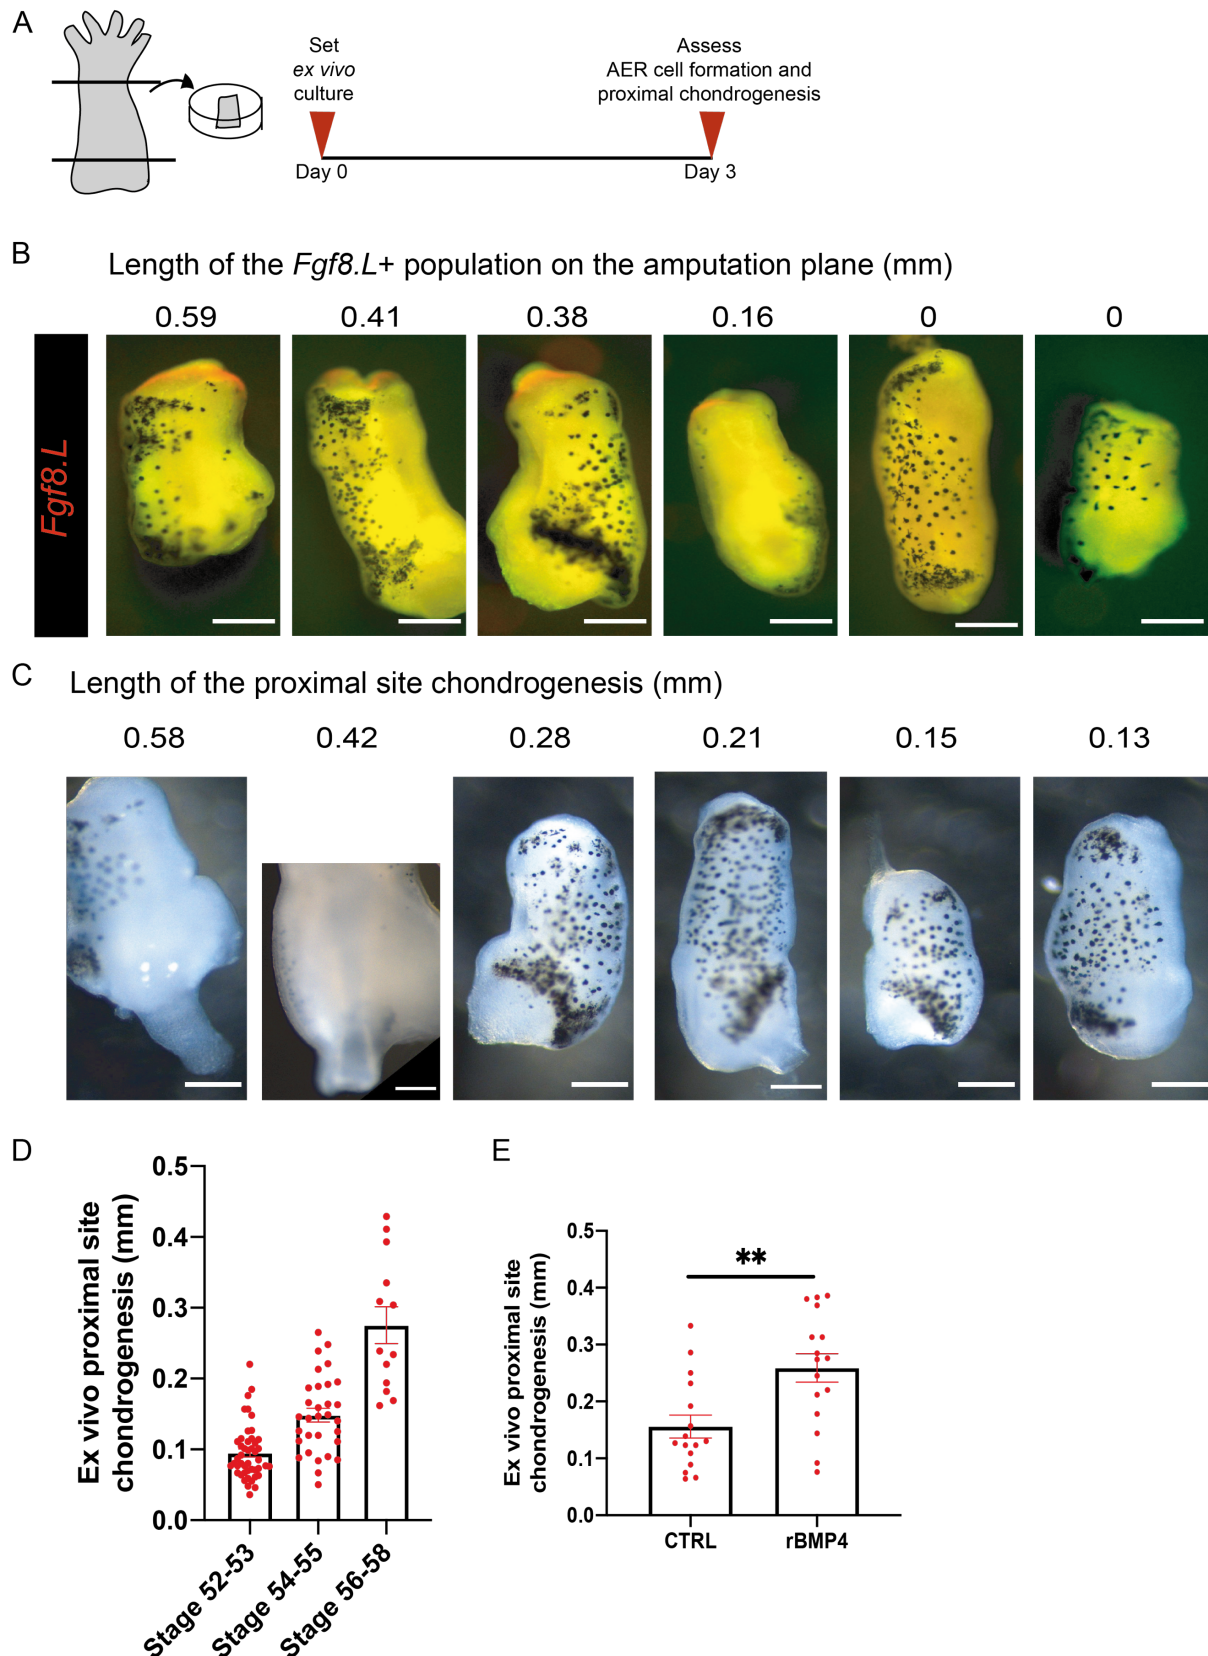

1150

1151 **Fig S12. The distal site of *ex vivo* regenerating limbs can be used to detect AER cell**  
1152 **formation, and the proximal site of explants can be used for detecting chondrogenesis.**

1153 (A) Schematics describing the *ex vivo* culture protocol for assessing *Fgf8.L* mRNA expression  
1154 at the distal site, and chondrogenesis levels at the proximal site. All assessments were carried

1155 out at 3-days post culture start. **(B)** Images of *Fgf8.L* stained limb explants at 3 dpa. Numbers  
1156 at the top indicates AER cell formation measured as the length of *Fgf8.L+* signal on the  
1157 amputation plane. Red, *Fgf8.L* mRNA. Scale= 200  $\mu$ m. **(C)** Images of chondrogenesis at the  
1158 proximal site of explants at 3 dpa. Numbers at the top indicates the measured proximal  
1159 chondrogenesis extent. Scale= 200  $\mu$ m. **(D)** *Ex vivo* regenerating limb cultures can be used to  
1160 investigate chondrogenesis. Explants were cultured for 3 days and chondrogenesis was  
1161 measured as in (C). The extent of chondrogenesis seen at the proximal site of explants changes  
1162 with the developmental stage and coincides with the progression of *in vivo* chondrogenesis (5).  
1163 Regeneration-competent explants= total 46 samples from 4 biological replicates;  
1164 Regeneration-restricted explants= total 31 samples from 3 biological replicates; Regeneration-  
1165 incompetent explants= total 13 samples from 3 biological replicates.  $P^{**} < 0.001$ . **(E)** Explants  
1166 were cultured for 3 days with BMP4 and the extent of chondrogenesis was measured. Addition  
1167 of recombinant BMP4 to the explant media increased the observed chondrogenesis at the  
1168 proximal site. Control 0.1% BSA, total n= 16 samples from 4 biological replicates;  
1169 recombinant BMP4, total n= 16 samples from 4 biological replicates.

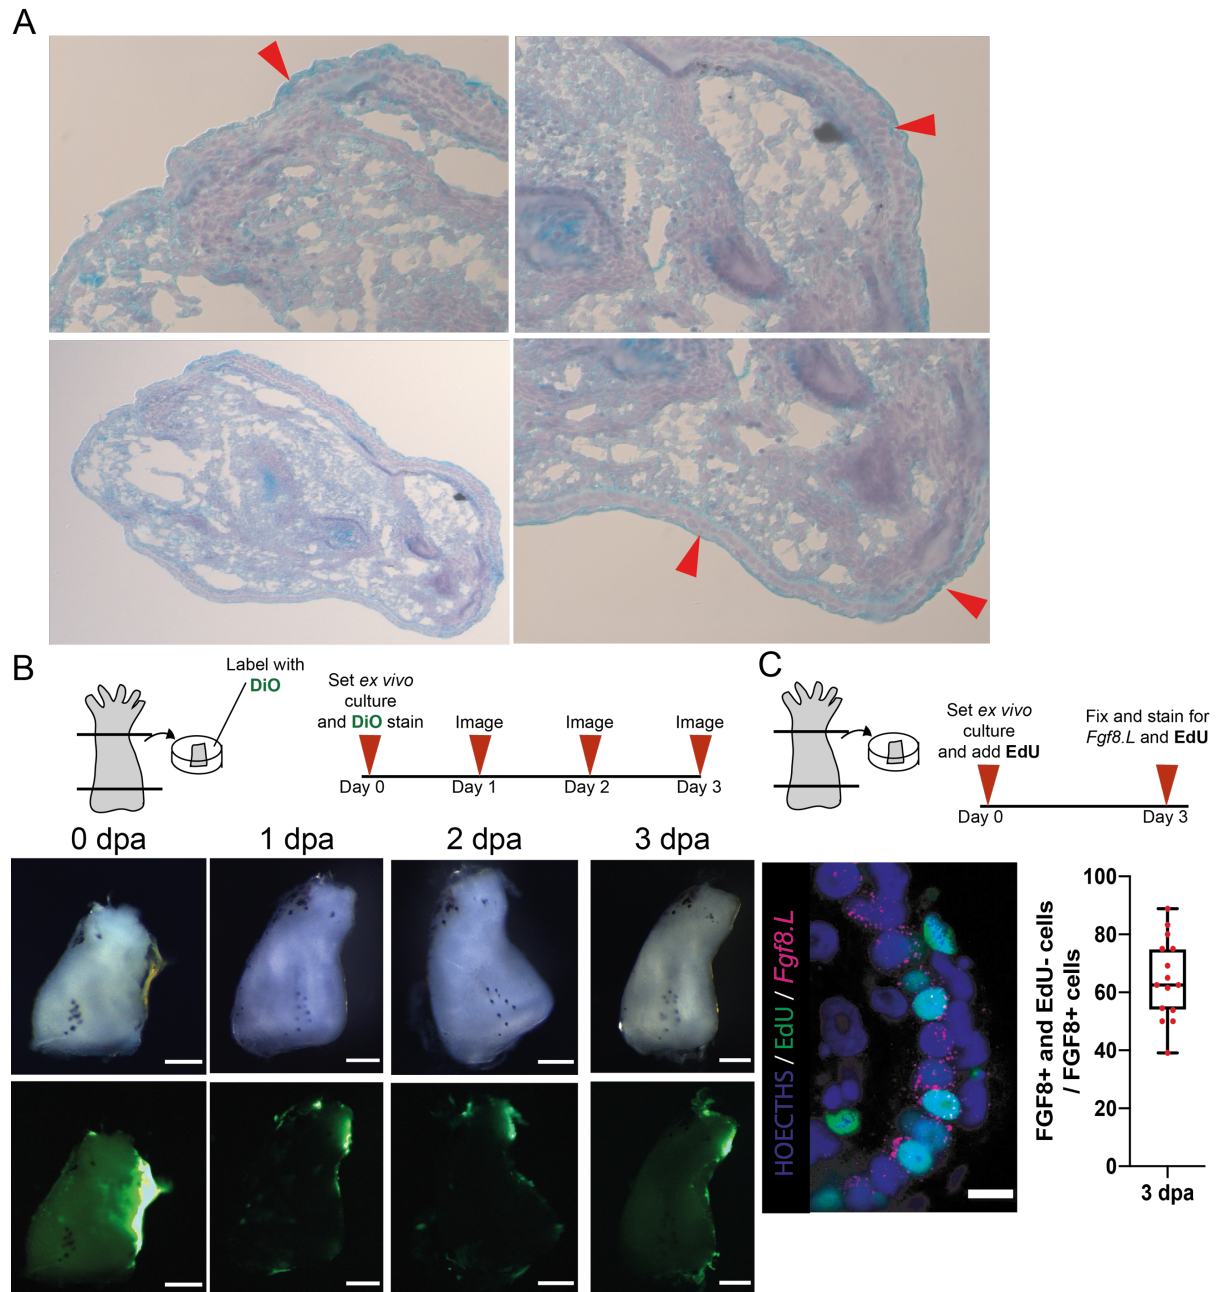

1170

1171

1172

1173

1174

1175

1176

1177

1178

1179

1180

1181

1182

1183

**Fig S13. AER cells formation does not require cell division.**

(A) Explants are covered with cells morphologically similar to the surrounding basal epidermal cells as evidenced by haematoxylin, eosin, and Alcian blue stain. There are multi-layered or monolayered epidermal cells with cuboidal shape that can be seen not only at the distal site (right-bottom) but also at the lateral sides as well (right-top). A squamous layer can be seen above the basal epidermal cells. (B) (Top) Schematic describing DiO based tissue tracing. DiO labelling was performed after *ex vivo* cultures were harvested. Explants were imaged every day until day 3 in culture. (Bottom) DiO tracing applied to the sides of explants and traced over time and images were taken in brightfield and green channel. Traced tissues migrated to the distal and proximal amputation planes of explants. Total n = 22 from 2 biological replicates. Scale = 200  $\mu$ m. (C) (Top) Schematics describing *ex vivo* culture with EdU treatment. EdU was added to explant media at the beginning of the culture. (Bottom-left) Explants were fixed and stained for *Fgf8.L* and EdU after day 3 in culture. (Bottom-middle) Example confocal



1184 image of a sample stained for *Fgf8.L*, *Lgr5.S*, and EdU, showing that not all *Fgf8.L*/*Lgr5.S*+  
1185 cells are EdU+. Hoechst, Blue; EdU, Green, *Fgf8.L* mRNA, Magenta. Scale = 10  $\mu$ m. (Bottom-  
1186 Right) Quantification of EdU positive AER cells proportion to all detected AER cells. 70% of  
1187 AER cells are EdU negative. Total n= 15 from 3 biological replicates.

1188

1189

1190

1191

1192

1193

1194

1195

1196

1197

1198

1199

1200

1201

1202

1203

1204

1205

1206

1207

1208

1209

1210

1211

1212

1213

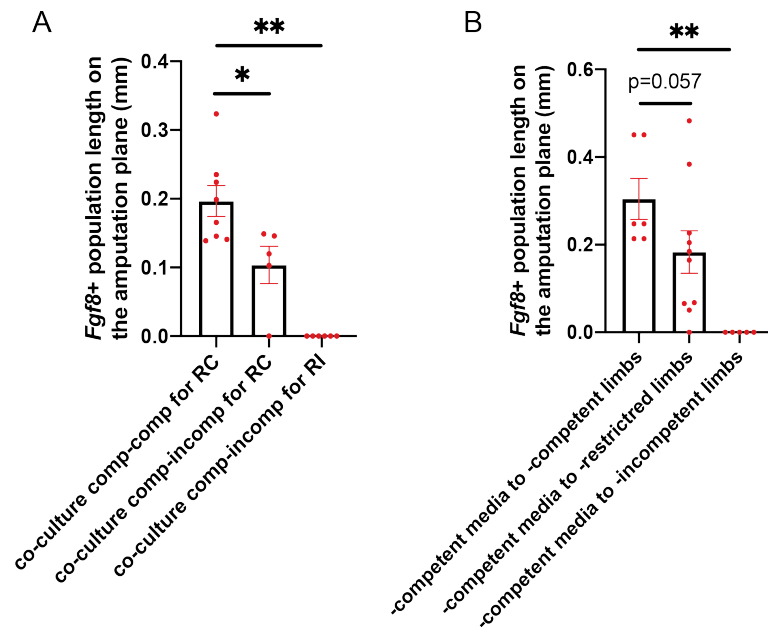

1214

1215 **Fig S14. Regeneration-competent explants extrinsic cues are not sufficient to induce AER**  
1216 **cells on the amputation plane of regeneration-incompetent explants.**

1217 **(A)** Co-culturing regeneration-competent with -incompetent explants does not enable AER cell  
1218 formation ability in -incompetent explants. Co-culture of regeneration-competent-competent  
1219 and assess -competent: total n=8, from 2 biological replicates, Co-culture regeneration-  
1220 competent-incompetent and assess -competent: n= 5 from 2 biological replicates. Co-culture  
1221 regeneration-competent-incompetent for -incompetent total n= 6 from 2 biological replicates.  
1222  $P^* < 0.05$ , and  $P^{**} < 0.001$ . **(B)** Treatment with -competent conditioned media does not enable  
1223 AER cell formation in -incompetent explants. Adding -competent-media to -competent  
1224 explants: total n=6, from 2 biological replicates. Adding -competent-media to -restricted  
1225 explants: n= 10, from 3 biological replicates. Adding -competent-media to -incompetent  
1226 explants: n= 5, from 1 biological replicate.  $P^{**} < 0.001$ .

1227

1228

1229

1230

1231

1232

1233

1234

1235

1236

1237

1238

1239

1240

1241

1242

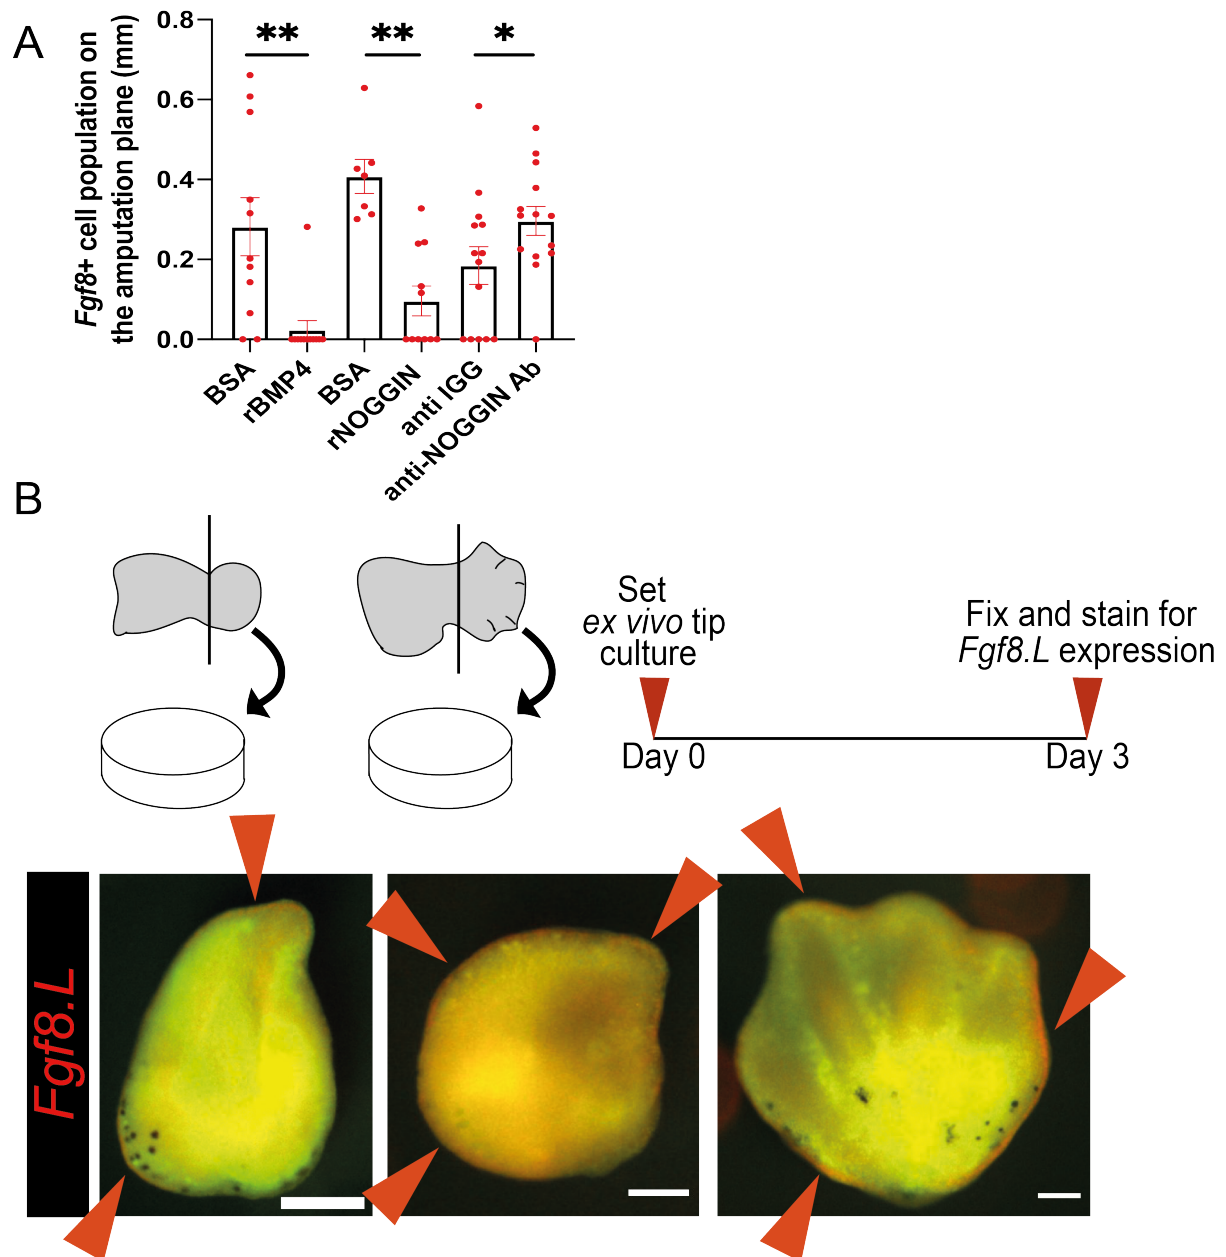

1243

1244

1245 **Fig S15. A regulated level of BMP pathway activation is required for AER cell formation,**  
 1246 **and reducing the proportion of chondrogenic lineage populations in explants can induce**  
 1247 **ectopic AER cell formation.**

1248 (A) Regeneration-competent explants were treated with recombinant BMP4, recombinant

1249 NOGGIN, and anti-NOGGIN antibodies. Contralateral limbs were used as controls and treated

1250 with vehicle solutions (0.1% BSA, or anti-IGG). Recombinant BMP4 or NOGGIN additions

1251 block AER cell formation. Anti-NOGGIN antibody treatment enhances AER cell formation.

1252 From left to right 0.1% BSA: total n=11 from 3 biological replicates; rBMP4: total n= 12 from

1253 3 biological replicates; 0.1% BSA: total n=7 from 2 biological replicates; rNOGGIN: total

1254 n=11 from 2 biological replicates; anti-IGG antibody: total n=14 from 4 biological replicates;

1255 anti-NOGGIN antibody: total n=14 from 4 biological replicates. Each sample group compared

1256 to their contralateral group to assess statistical significance.  $P^* < 0.05$ , and  $P^{**} < 0.001$ . (B)

1257 (Top) Schematic describing the protocol for culturing distal limb buds (NF stage ~52) and early

1258 autopods (NF Stage ~54). Tip explants were cultured for 3 days in explant media, and assessed

1258 for *Fgf8.L* expression. (Bottom) Tip cultures show ectopic *Fgf8.L* expression. Red arrows show  
1259 *Fgf8.L* expression regions. Ectopic AER formation is seen in total 16/18 cases from 2  
1260 biological replicates. Red, *Fgf8.L* mRNA. Scale= 100  $\mu$ m.

1261  
1262  
1263  
1264  
1265  
1266  
1267  
1268  
1269  
1270  
1271  
1272  
1273  
1274  
1275  
1276  
1277  
1278  
1279  
1280  
1281  
1282  
1283  
1284  
1285  
1286  
1287  
1288  
1289  
1290  
1291  
1292  
1293  
1294  
1295  
1296

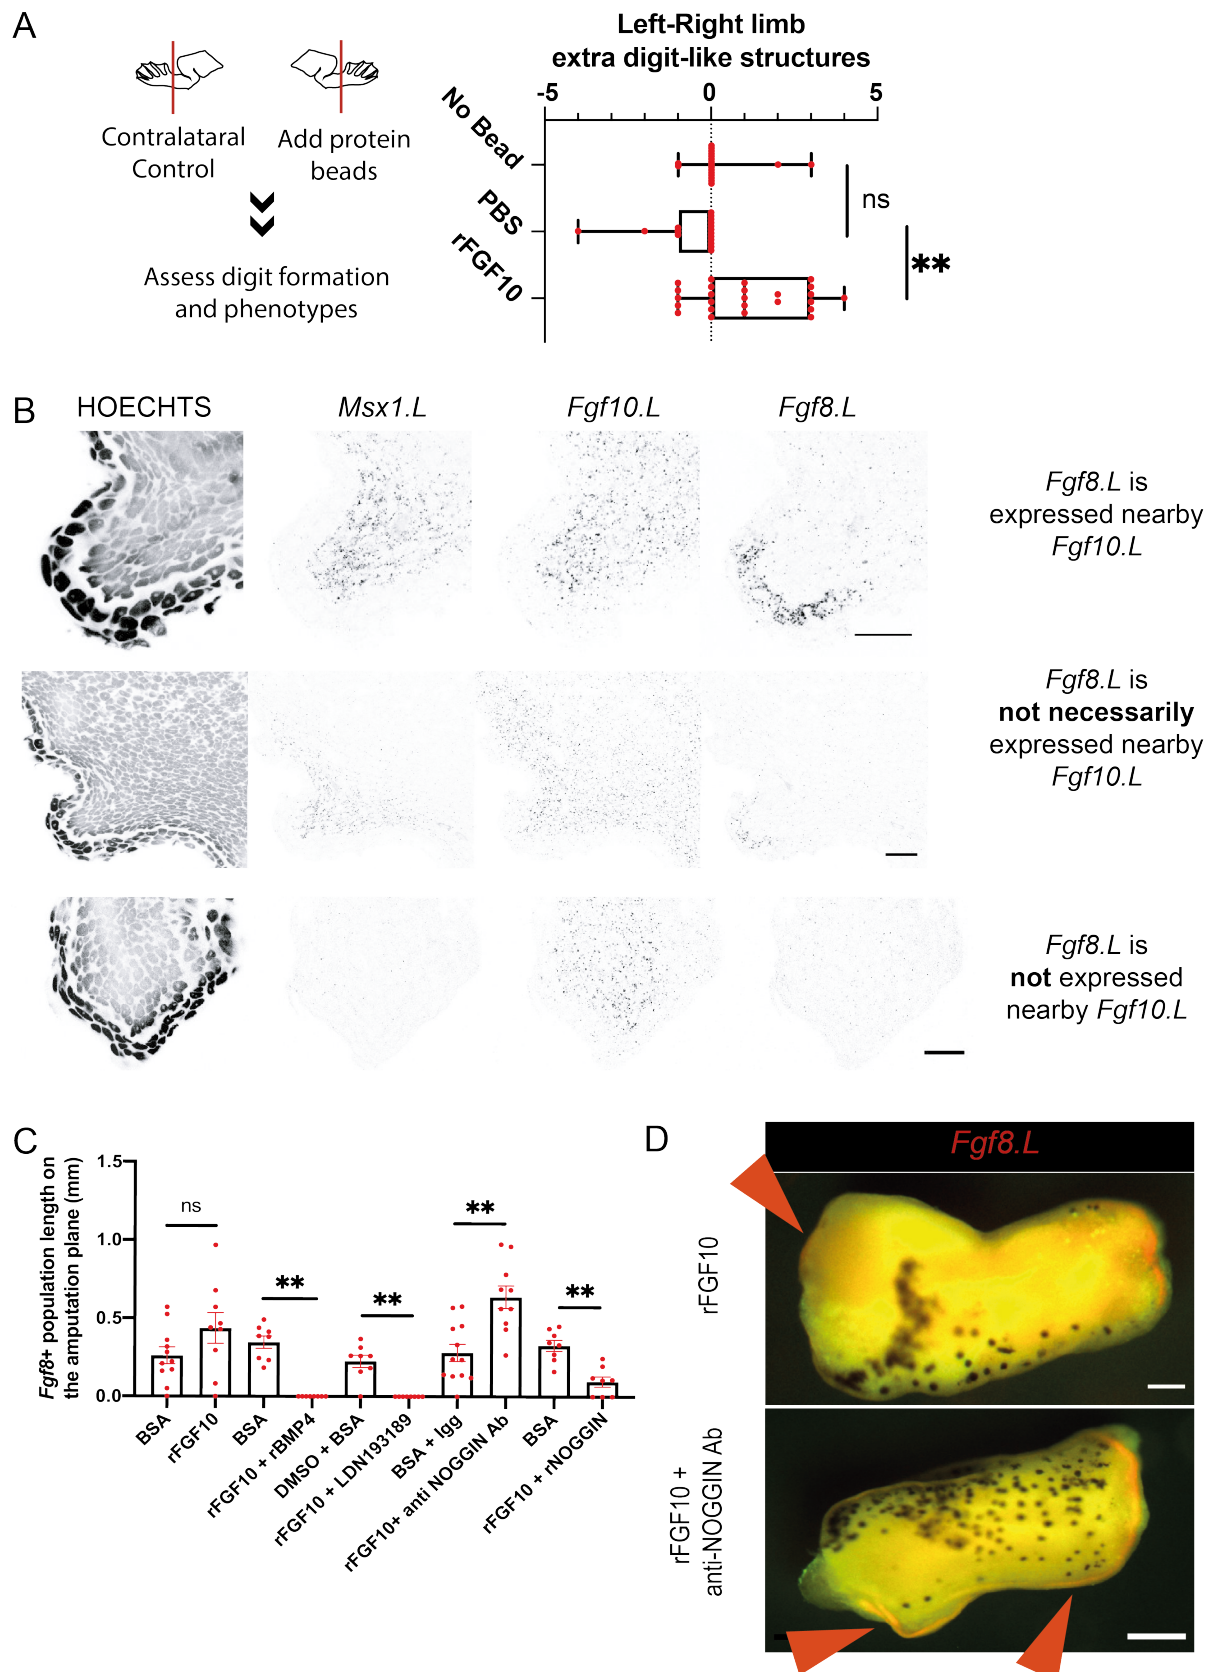

1297

1298

1299

1300

1301

**Fig S16. FGF10 application can restore regeneration and block chondrogenesis while FGF pathway inactivation enhances chondrogenesis.**

(A) Recombinant FGF10 application to distal amputations restore regeneration in –restricted and –incompetent tadpoles. –Restricted and –incompetent tadpole right and left hindlimbs were

1302 amputated and beads containing 0.1% BSA/PBS or recombinant FGF10 were placed on the  
1303 right hindlimbs. Formed digits and digit-like structures were quantified in the right and left  
1304 hindlimbs and the difference calculated. PBS beads application had no significant difference  
1305 to empty controls, meanwhile recombinant FGF10 application improved regeneration. Empty  
1306 total n=19 from 2 biological replicates; 0.1%/PBS bead total n=17 from 5 biological replicates;  
1307 recombinant FGF10 bead total n=25 from 5 biological replicates. ns = not significant,  $P^{**}<$   
1308 0.001. **(B)** Examples of confocal images of 5 dpa samples from regeneration-competent  
1309 tadpoles stained for *Msx1.L*, *Fgf10.L* and *Fgf8.L*. Top image series show high levels of *Fgf10.L*  
1310 and *Msx1.L* in the mesenchyme associated with high levels of *Fgf8.L* in the surrounding  
1311 epidermis. Middle image series show that not all epidermis in proximity of *Fgf10.L* +  
1312 mesenchymal cells are expressing *Fgf8.L*. *Msx1.L* + mesenchymal cells are more correlated to  
1313 *Fgf8.L*+ epidermis than *Fgf10.L* + mesenchymal cells. Bottom, although there is a high level  
1314 of *Fgf10* expression detected in mesenchyme, no *Fgf8.L* in epidermis or *Msx1.L* in  
1315 mesenchyme can be seen. Scale, 20  $\mu$ m. **(C)** Regeneration-competent explants were treated  
1316 with rFGF10, alone or in combination with recombinant BMP4, recombinant NOGGIN,  
1317 LDN193189, anti-NOGGIN antibody. 0.1% BSA/PBS and anti-IGG antibody were used as  
1318 controls. From left to right, BSA: total n=11 from 2 biological replicates; FGF10: total n=9  
1319 from 2 biological replicates; BSA: total n=8 from 2 biological replicates; recombinant FGF10  
1320 and recombinant BMP4: total n=8 from 2 biological replicates; DMSO and BSA: total n=8  
1321 from 2 biological replicates; FGF10 and LDN total n=8 from 2 biological replicates; BSA and  
1322 anti-IGG antibody: total n= 12 from 3 biological replicates; FGF10 and anti-NOGGIN  
1323 antibody: total n=10 from 3 biological replicates; BSA: total n=8 from 2 biological replicates;  
1324 recombinant FGF10 and recombinant NOGGIN: total n= 8 from 2 biological replicates.  $P^{*}<$   
1325 0.05, and  $P^{**}<$  0.001. **(D)** Example images of rFGF10 only or rFGF10 and anti-NOGGIN  
1326 antibody treated explants showing ectopic *Fgf8.L* expression. rFgf10 treated explants can show  
1327 a very mild expression of *Fgf8.L* at their proximal sites (n=4/7 from 2 biological replicates).  
1328 rFGF10 and anti-NOGGIN antibody treated explants can show a substantial *Fgf8.L* expression  
1329 at different sites of the explant (n=5/9 from 2 biological replicates). Scale, 200  $\mu$ m.

1330

1331

1332

1333

1334

1335

1336

1337

1338

1339

1340

1341

1342

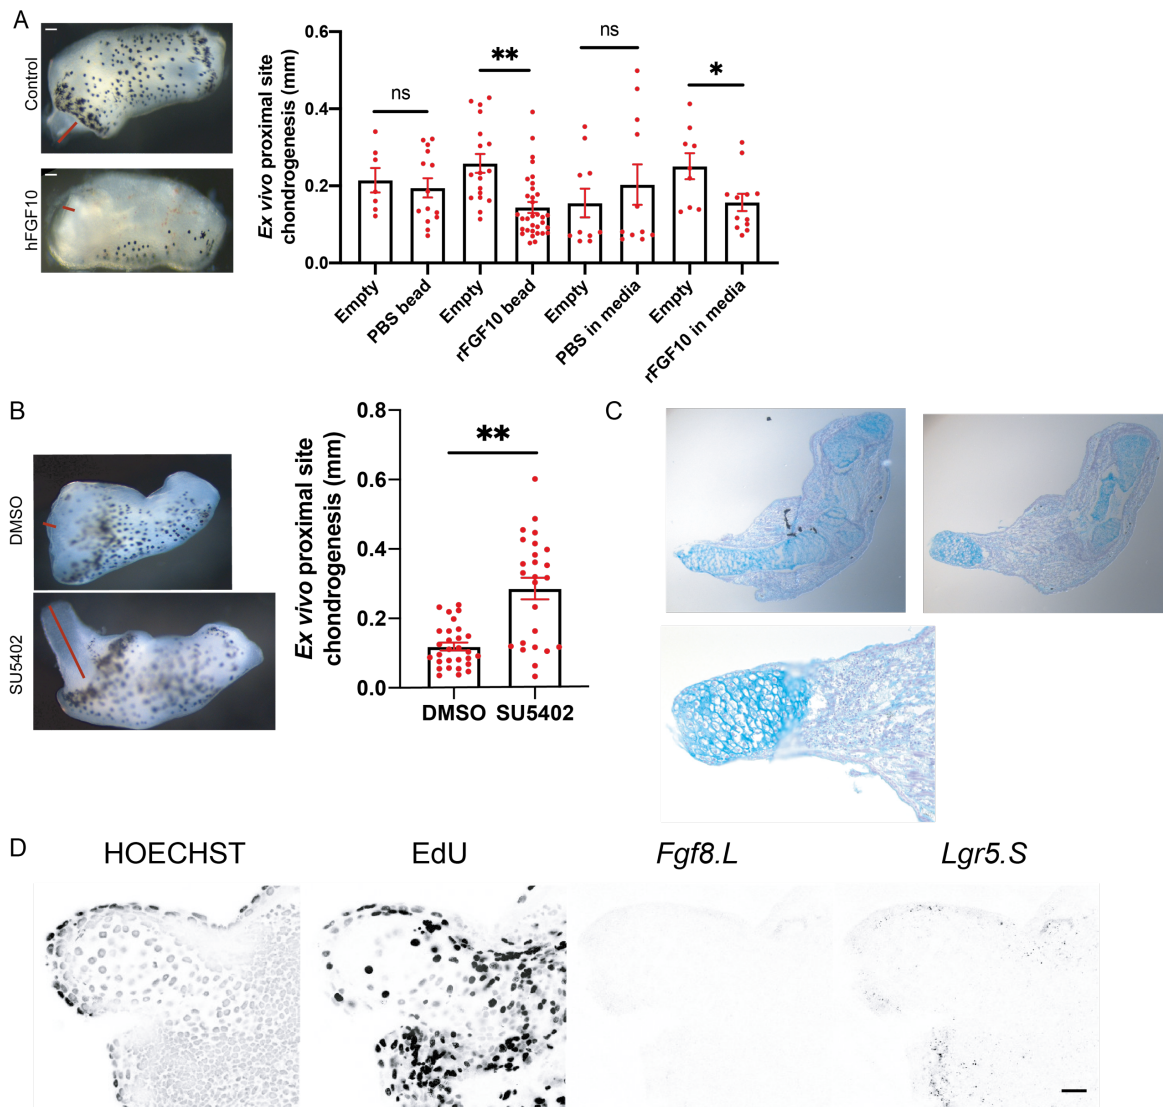

1343

1344 **Fig S17. FGF10 application can block chondrogenesis, and blocking FGF pathway**  
 1345 **enhances chondrogenesis**

1346 **(A)** The effect of FGF10 on chondrogenesis is assessed by measuring the chondrogenic  
 1347 outgrowth at the proximal sites of -restricted explants at 3 dpa. Implanting 0.1% BSA/PBS  
 1348 beads to the proximal site or supplying 0.1% BSA/PBS to the media had no significant effect  
 1349 on chondrogenesis while implanting Fgf10 beads to the proximal site or supplying FGF10 in  
 1350 media reduced chondrogenesis. From left to right, empty and PBS beads total  $n \geq 7$ , from at  
 1351 least 2 biological replicates; empty and FGF10 bead total  $n \geq 14$ , from at least 4 biological  
 1352 replicates; empty and 0.1% BSA/PBS in media total  $n=10$  from 3 biological replicates; empty  
 1353 and FGF10 in media  $\geq n=14$  from at least 3 biological replicates. ns = not significant,  $P^* < 0.05$ ,  
 1354 and  $P^{**} < 0.001$ . **(B)** (Left) Example images of SU5402 treated explant showing extensive  
 1355 chondrogenesis at the proximal site. (Right) Blocking FGFR via small molecule inhibitor  
 1356 SU5402 extends chondrogenesis in 3 days for -competent and -restricted explants.  
 1357 Contralateral limbs were used as control and treated with DMSO. DMSO total  $n=29$ , from 7  
 1358 biological replicates, and SU5402 total  $n=25$  from 7 biological replicates.  $P^{**} < 0.001$ . **(C)**  
 1359 Example histology images for explants treated with SU5402. The outgrowing structure are  
 1360 alcian blue rich indicative of chondrogenic cells. **(D)** Example confocal images of explants

1361 proximal site showing sparse circular nucleus indicative of chondrogenic cells as well as lack  
1362 of *Fgf8.L* in epidermis. Scale bar = 15  $\mu$ m.

1363

1364 **Supplemental table 1:** Quality control of scRNA-Seq data.

1365

1366

1367
